# Population risk factors for severe disease and mortality in COVID-19: A global systematic review and meta-analysis

Adam Booth <sup>1¶</sup> & Angus Bruno Reed <sup>1¶</sup>, Sonia Ponzo <sup>1</sup>, Arrash Yassae <sup>1</sup>, Mert Aral <sup>1</sup>, David Plans <sup>1\*</sup>, Alain Labrique <sup>2</sup>, Diwakar Mohan <sup>2</sup>

<sup>¶</sup> These authors contributed equally.

1. Huma Therapeutics Limited, London, England.
2. Johns Hopkins Bloomberg School of Public Health, Baltimore, MD, United States.

\* Corresponding Author: David Plans ([david.plans@huma.com](mailto:david.plans@huma.com))

## Disclosure statement

A.B., A.B.R., S.P., D.P., A.Y., M.A., are employees of Huma Therapeutics Ltd.

D.M. & A.L. declare that they have no conflict of interests to report.

## Funding

This research was funded by Huma Therapeutics Ltd.

## Keywords

COVID-19; SARS-CoV-2; severe; risk factors; mortality; meta-analysis; clinical characteristics

# Abstract

**Aim:** COVID-19 clinical presentation is heterogeneous, ranging from asymptomatic to severe cases. While there are a number of early publications relating to risk factors for COVID-19 infection, low sample size and heterogeneity in study design impacted consolidation of early findings. There is a pressing need to identify the factors which predispose patients to severe cases of COVID-19. For rapid and widespread risk stratification, these factors should be easily obtainable, inexpensive, and avoid invasive clinical procedures. The aim of our study is to fill this knowledge gap by systematically mapping all the available evidence on the association of various clinical, demographic, and lifestyle variables with the risk of specific adverse outcomes in patients with COVID-19.

**Methods:** The systematic review was conducted using standardized methodology, searching three electronic databases (PubMed, Embase, and Web of Science) for relevant literature published between 1<sup>st</sup> January 2020 and 9<sup>th</sup> July 2020. Included studies reported characteristics of patients with COVID-19 while reporting outcomes relating to disease severity. In the case of sufficient comparable data, meta-analyses were conducted to estimate risk of each variable.

**Results:** Seventy-six studies were identified, with a total of 17,860,001 patients across 14 countries. The studies were highly heterogeneous in terms of the sample under study, outcomes, and risk measures reported. A large number of risk factors were presented for COVID-19. Commonly reported variables for adverse outcome from COVID-19 comprised patient characteristics, including age >75 (OR = 2.65 (1.81–3.90)), male sex (OR = 2.05(1.39–3.04)) and severe obesity (OR = 2.57 (1.31–5.05)). Active cancer (OR = 1.46 (1.04–2.04)) was associated with increased risk of severe outcome. A number of common symptoms and vital measures (respiratory rate and SpO2) also suggested elevated risk profiles.

**Conclusions:** Based on the findings of this study, a range of easily assessed parameters are valuable to predict elevated risk of severe illness and mortality as a result of COVID-19, including patient characteristics and detailed comorbidities, alongside the novel inclusion of real-time symptoms and vital measurements.

## 25 Introduction

26 SARS-CoV-2, first reported to the WHO on 31 December 2019, has subsequently exponentially spread with  
 27 cases now officially reported in 215 countries and territories [1]. Following infection, individuals may develop  
 28 COVID-19, an influenza-like illness targeting, primarily, the respiratory system. The clinical pathophysiology  
 29 of COVID-19 is still the subject of ongoing research. It is clear, however, that clinical presentation is  
 30 heterogeneous, ranging from asymptomatic to severe disease. Evidence suggests most patients move through  
 31 two phases: (a) viral replication over several days with relatively mild symptoms; (b) adaptive immune response  
 32 stage, which may cause sudden clinical deterioration [2]. Severe symptoms are thought to be the consequence of  
 33 the SARS-CoV-2 virus invading type II alveolar epithelial cells, causing the release of cytokines and  
 34 inflammatory markers. This ‘cytokine storm’ attracts neutrophils and T cells, which in turn cause significant  
 35 lung injury and inflammation, eventually leading to acute respiratory distress syndrome [3]. There are a number  
 36 of different classifications of COVID-19, with recent attempts to sub-divide intensive care patients into different  
 37 clinical phenotypes [4]. Guidelines for the classification of COVID-19 disease severity in adults were first  
 38 reported in February 2020 and have since been widely adopted internationally [5]. Reported complications and  
 39 long-term sequelae in survivors are varied and include neurologic, hematologic, musculoskeletal,  
 40 cardiovascular, and GI-related issues [6]. While most patients recover quickly, a growing number are suffering  
 41 from so-called ‘long COVID’, a multisystem, post-viral condition with symptoms including fatigue, anxiety,  
 42 low mood, cognitive problems, and atypical chest pain, stretching over a period of weeks or months without  
 43 recovery [7]. In addition, mental health conditions (e.g. PTSD, depression, and anxiety) are also known to result  
 44 from extended ICU admission [8].

45 COVID-19 has posed unprecedented care and logistic challenges, with resource-intense care settings such as  
 46 critical care having to increase capacity by up to 300% [9]. This has significant downstream effects on wider  
 47 healthcare capacity, including the delivery of elective surgical care and mental health services [10]. For  
 48 example, DATA-CAN estimates that the impact of reducing access to cancer screening, triage, and treatment  
 49 will result in a further 7,165-17,910 excess deaths amongst the UK population within one year [11]. It is for this  
 50 reason that many national strategies have focused, from the outset, on preventing health systems becoming  
 51 overloaded by clinical demand [12].

52 The ability to predict the likelihood of severe health outcomes in patients affected by COVID-19 has the  
 53 potential to inform decision-making at the individual, provider, and government level. At the patient level,  
 54 accurate prognostication could facilitate evidence-based decisions around shielding. At a provider level,  
 55 predictors of severity, if coupled with epidemiological models, could enable accurate scenario planning and  
 56 inform resource allocation decisions. At a governmental level, population-wide risk assessments could help  
 57 inform the targeted use of non-pharmacological interventions, potentially minimising the economic and  
 58 population health impact of wide-sweeping social distancing measures. Furthermore, with news that national  
 59 governments have begun procuring COVID-19 vaccines, an evidence-based risk stratification tool could help  
 60 policymakers decide which segments of the population to prioritise in national vaccination programmes [13].

Although serologic biomarkers are useful in grading the severity of a COVID-19 case upon admission to the hospital, patients are often experiencing severe disease by the time they present clinically. The ability to stratify cases earlier in the disease process (based on demographics and lifestyle factors) could prove invaluable to initiating earlier referrals and possibly improving patient outcomes. To allow rapid and widespread risk stratification, these factors should be easily obtainable, inexpensive, and avoid invasive clinical procedures. These factors should also help shape decision-making at an individual, provider, and system level. To this end, we included symptom information in our analysis on the grounds that individuals isolating at home with COVID-19, along with their clinical team, can be informed about their risk of deterioration as and when new symptoms develop. Retrospective cohort data suggest that many patients present to hospital more than seven days after onset of symptoms, potentially offering providers some, albeit short, notice to prioritise resources if necessary [14]. In contrast, blood tests are only likely to be of value in stratifying disease severity amongst those patients already severe enough to require hospitalisation. Blood test data would, therefore, provide limited use for individuals' behaviour modification or remote monitoring, and is unlikely to help providers anticipate increased clinical demand.

However, there are challenges in creating such a prognostic tool based on individual or small numbers of studies. While the volume of academic reporting on clinical features of COVID-19 has been unprecedented, low sample size and heterogeneity in study design impacted the consolidation of early findings. Early reports on clinical features were limited to Wuhan, China [15], and the lack of geographical, cultural, and ethnic diversity has restricted the generalisability of findings. As such, the aim of our study is to fill this knowledge gap by systematically mapping all the available evidence on the association of various clinical, demographic, and lifestyle variables with the risk of specific adverse outcomes in patients with COVID-19.

## Methods

This protocol is in line with the recommendations outlined in the Preferred Reporting Items for Systematic Reviews and Meta-Analyses (PRISMA) statement.

## Eligibility criteria

Peer-reviewed observational studies published between 1<sup>st</sup> January 2020 and 9<sup>th</sup> July 2020 in the English language were included. Only papers reporting original data on adult (>16 years old) patients with laboratory-confirmed SARS-CoV-2 were selected. The minimum sample size for inclusion was 100 patients. Narrative reviews, case reports, papers only reporting laboratory or imaging data, and papers not reporting original data were not included. Studies including homogeneous populations with exclusion criteria (e.g. female patients pregnant at the time the study was conducted) were also excluded.

## Information sources and search strategy

A systematic review using PubMed, EMBASE, and Web of Science was conducted. Additionally, a thorough hand search of the literature and review of the references of included papers in the systematic review

was carried out to minimize the likelihood that the used search terms did not identify all relevant papers. The following search terms were included: ncov\* OR coronavirus OR "SARS-CoV-2" OR "covid-19" OR covid, AND ventilator OR ICU OR "intensive care" OR mortality OR prognosis OR ARDS OR severity OR prognosis OR hospitaliz\* OR hospitaliz\* OR "respiratory failure" OR intubation OR ventilation OR admission\* OR admitted OR "critical care" OR "critical cases", AND clinical OR symptom\* OR characteristic\* OR comorbidit\* OR co morbidit\* OR risk OR predict\* and "PUBYEAR > 2019". Comprehensive search terms can be found in supplementary material (S1 Table).

## Study selection

Two authors (A.B.R. and A.B.) independently reviewed titles and abstracts to ascertain that all included articles were in line with the inclusion criteria (Fig. 1). Studies with missing, unclear, duplicated, or incomplete data were excluded from the review. Observational studies including original data on at least 100 adult patients with laboratory-confirmed SARS-CoV-2, whether hospitalised or in outpatient settings, were included in the meta-analysis.

## Data collection process and data items

The following information was extracted from each selected article: author, publication year, article title, location of study, SARS-CoV-2 case identification, study type (e.g. primary research, review, etc), peer-review status, quality assessment, and total sample size. Extracted data included sample demographics (age, sex, ethnicity), obesity/BMI status, smoking status, blood type, any existing comorbidities, symptoms, basic clinical variables (e.g. heart rate, respiration rate, and oxygen saturation), and their clinical outcomes of severe (severe case definition, admission to ICU, invasive mechanical ventilation (IMV), and death) versus non-severe comparator event (e.g. no ICU admission, survival/recovery). Data extraction was carried out using software specifically developed for systematic review (Covidence, Veritas Health Innovation, Melbourne, Australia).

**Fig 1.** PRISMA diagram.

## Assessment of methodological quality and risk of bias

An adapted version of the Newcastle-Ottawa Scale [16] was used during full-text screening to assess the methodological quality of each article. Two authors reviewed the quality of included studies (A.B.R. and A.B.), with conflicts resolved in consensus. Studies were judged on three criteria: selection of participants; comparability of groups; and ascertainment of the exposure and outcome of interest.

## Statistical approach

Reported measures relating to patient characteristics, comorbidities, symptoms, and vital signs were extracted from included articles. We analysed similar risk metrics for each outcome and pooled extracted values. Where possible, a meta-analysis was carried out to assess the strength of association between reported risk factors and two outcomes: severe and mortality. Severe outcome was defined as the clinical definition of severe,

ICU admission, or IMV, while excluding hospitalisation. If a study reported multiple outcomes, then the clinical definition of severe [17,18] was taken to avoid duplication of data. Meta-analysis regression of reported multivariate Odds Ratios (ORs) were pooled with estimated effect size calculated using a random-effects model.

To accommodate for heterogeneity across the studies, we estimated risk weighting for each reported variable across two endpoints: severe COVID-19 (comprising severe case definition, ICU admission, and IMV) and mortality from COVID-19. If at least two studies reported ORs (multivariate or univariate) for the same clinical variable, pooled weighted estimates were calculated on the basis of sample size and standard error. Data were analysed using the R statistical software [19]. The meta-analysis and plots were created using the R package *meta* [20].

## Results

The comprehensive search of databases and cross-referencing hand search identified 2122 articles meeting the search criteria, following removal of duplicates. During screening of title and abstract, 1991 articles were excluded. Consequently, 131 articles were selected for full-text review. Of these, 76 articles were deemed to meet the inclusion/exclusion criteria. Articles were excluded for the following primary reasons: repeated data (n=19); wrong design/outcome of interest (n=18); insufficient sample size (n=7); homogenous population (n=6); and editorial or commentary (n=5) (full reasoning is noted in Fig. 1). A summary of all included studies' characteristics and quality assessment is given in Table 1. Inter-rater reliability of article inclusion was substantial ( $\kappa=0.74$ ).

Research was pooled from 14 geographies with China the most commonly reported (n=43) [14,21–33,33–62], followed by USA (n=15) [63–77], Italy (n=4) [78–81], and UK (N=3) [82–84]. The remaining papers were from Mexico [85,86], South Korea [87,88], Turkey [89], Brazil [90], Denmark [91], France [92], Israel [93], Iran [94], and Poland [95]. A total of 17,860,001 subjects are described in the included studies; however, after excluding two large national cohort studies which involved non-COVID-19 subjects [83,84], the final sample included data on 153,115 reported individuals with COVID-19.

Reported outcomes across studies varied and were categorised into five grouped endpoints: severe, hospitalisation, ICU admission, IMV, composite endpoint (considered as ICU, IMV, or mortality), and mortality.

The literature reported a wide variety of variables that may provide insight to estimate risk of adverse outcomes in COVID-19. These variables were grouped into four categories: patient characteristics, comorbidities, presenting symptoms, and vital signs (Table 1). Univariate ORs were reported, or calculated where sufficient data was presented, in 65 articles. Multivariate ORs were reported in 45 studies, while 17 reported Hazard Ratios and two reported Risk Ratios.

| Study                    | Publication date | Country       | Study design                                      | Sample size (n) | Severe    | Non-severe comparator  | Patient characteristics            | Comorbidities                                                                                                                                                                                                                                              | Symptoms                                                                                                | Vital signs             | Study Quality (mNOS) |
|--------------------------|------------------|---------------|---------------------------------------------------|-----------------|-----------|------------------------|------------------------------------|------------------------------------------------------------------------------------------------------------------------------------------------------------------------------------------------------------------------------------------------------------|---------------------------------------------------------------------------------------------------------|-------------------------|----------------------|
| Argenziano 2020 [63]     | 29/05/2020       | United States | Retrospective single-centre, case series          | 1000            | ICU       | ER, hospital (non-ICU) | Male, Age, BMI, Smoking, Ethnicity | Any comorbidity, Hypertension, CVD, Diabetes, Cerebrovascular Disease, Chronic Liver Disease, Asthma, COPD, Sleep Apnoea, Active Cancer, Interstitial Lung Disease, CKD, Transplant history, Rheumatic Disease, Chronic Lung Disease, Viral Hepatitis, HIV | Fever, Myalgia, Cough, Sputum, Dyspnoea, Nausea, Diarrhoea, Pharyngalgia, Headache, Chills, Rhinorrhoea |                         | 6                    |
| Baqui 2020 [90]          | 02/07/2020       | Brazil        | Retrospective multi-centre, cross sectional study | 11321           | Mortality | Survived/Recovered     | Male, Age, BMI, Ethnicity          | CVD, Diabetes, Chronic Liver Disease, Chronic Lung Disease, Asthma, Immunosuppression, CKD, Neurological Disease                                                                                                                                           |                                                                                                         |                         | 9                    |
| Bello-Chavolla 2020 [85] | 01/07/2020       | Mexico        | Retrospective multi-centre, cross sectional study | 51,633          | Mortality | Survived/Recovered     | Age, BMI                           | Diabetes, Chronic Lung Disease, Immunosuppression, CKD                                                                                                                                                                                                     | Haemoptysis                                                                                             |                         | 10                   |
| Cao 2020 [21]            | 13/03/2020       | China         | Retrospective single-centre, case series          | 102             | Mortality | Survived/Recovered     | Male                               | Any comorbidity, Hypertension, CVD, Cerebrovascular Disease, Chronic Liver Disease, Chronic Lung Disease, Active Cancer, CKD                                                                                                                               | Fever, Fatigue, Myalgia, Cough, Diarrhoea                                                               |                         | 6                    |
| Chen 2020 [22]           | 19/03/2020       | China         | Retrospective single-centre, case series          | 249             | ICU       | Non-ICU                | Male, Age                          | Any comorbidity                                                                                                                                                                                                                                            |                                                                                                         |                         | 10                   |
| Chen 2020 [23]           | 26/03/2020       | China         | Retrospective single-centre,                      | 274             | Mortality | Survived/Recovered     | Male, Age, Smoking                 | Any comorbidity, Hypertension, CVD,                                                                                                                                                                                                                        | Fever, Fatigue, Myalgia, Cough,                                                                         | Respiratory Rate, Heart | 6                    |

**Table 1.** Summary of studies

|                    |            |               | case series                                           |       |                                                                                                              |                                                                                                               |                | Diabetes, Chronic Lung Disease, Active Cancer, Immunosuppression, CKD, Chronic GI, Viral Hepatitis | Sputum, Dyspnoea, Chest pain, Nausea, Pharyngalgia, Headache, Dizziness, GI, Anorexia | Rate, Oxygen saturation % |
|--------------------|------------|---------------|-------------------------------------------------------|-------|--------------------------------------------------------------------------------------------------------------|---------------------------------------------------------------------------------------------------------------|----------------|----------------------------------------------------------------------------------------------------|---------------------------------------------------------------------------------------|---------------------------|
| Chen 2020 [24]     | 16/06/2020 | China         | Retrospective multi-centre, case series               | 1859  | Mortality                                                                                                    | Survived/Recovered                                                                                            | Age, Smoking   |                                                                                                    | Fever                                                                                 | 9                         |
| Cummings 2020 [64] | 19/05/2020 | United States | Retrospective multi-centre, case series               | 257   | Mortality                                                                                                    | Survived/Recovered                                                                                            | Male, Age      | Hypertension, CVD, Diabetes, Chronic Lung Disease                                                  |                                                                                       | 9                         |
| D'Silva 2020 [65]  | 26/05/2020 | United States | Retrospective, single-centre comparative cohort study | 156   | 1. Hospitalisation<br>2. Composite endpoint: Mechanical ventilation/intensive care admission<br>3. Mortality | 1. Non-hospitalisation<br>2. Non-mechanical ventilation/intensive care admission<br>3. Survival               |                | Rheumatic Disease                                                                                  |                                                                                       | 9                         |
| Dai 2020 [25]      | 28/04/2020 | China         | Retrospective, multi-centre comparative cohort study  | 641   | 1. Severe symptoms<br>2. Intensive care admission<br>3. Invasive Mechanical Intervention<br>4. Mortality     | 1. Mild symptoms<br>2. Non-intensive care admission<br>3. Non-invasive Mechanical Intervention<br>4. Survival |                | Active Cancer                                                                                      |                                                                                       | 6                         |
| Deng 2020 [26]     | 25/02/2020 | China         | Retrospective multi-centre, case series               | 225   | Mortality                                                                                                    | Survived/Recovered                                                                                            | Male           | Any comorbidity, Hypertension, CVD, Diabetes, Chronic Lung Disease                                 | Fever, Fatigue, Cough, Sputum, Dyspnoea                                               | 7                         |
| Docherty 2020 [82] | 22/05/2020 | UK            | Prospective multi-centre cohort study                 | 20133 | Mortality                                                                                                    | Discharged                                                                                                    | Male, Age, BMI | CVD, Diabetes, Chronic Liver Disease, COPD, Active Cancer, CKD, Dementia, Neurological Disease     | Diarrhoea                                                                             | 10                        |
| Du 2020 [27]       | 08/04/2020 | China         | Retrospective single-centre, case series              | 179   | Mortality                                                                                                    | Survived/Recovered                                                                                            | Male, Age      | Hypertension, CVD, Diabetes, Chronic GI                                                            | Fatigue, Myalgia, Cough, Sputum Dyspnoea,                                             | 8                         |



**Table 1.** Summary of studies

|                         |            |                 |                                                           |      |                                                             |                                                    |                                    |                                                                                                                           |                                                                                            | Headache, GI          |
|-------------------------|------------|-----------------|-----------------------------------------------------------|------|-------------------------------------------------------------|----------------------------------------------------|------------------------------------|---------------------------------------------------------------------------------------------------------------------------|--------------------------------------------------------------------------------------------|-----------------------|
| Ellinghaus 2020 [81]    | 17/06/2020 | Italy and Spain | Retrospective multi-centre, genome-wide association study | 3815 | Respiratory failure                                         | No respiratory failure                             | Blood Type                         |                                                                                                                           |                                                                                            | 10                    |
| Feng 2020 [28]          | 01/06/2020 | China           | Retrospective multi-centre, case series                   | 476  | Severe & critical disease (5th ed. COVID-19 guidelines NHC) | Moderate disease (5th ed. COVID-19 guidelines NHC) | Male, Age, Smoking, Alcohol Intake | Any comorbidity, Hypertension, CVD, Diabetes, Cerebrovascular Disease, COPD, Immunosuppression, CKD, Others               | Fever, Myalgia, Cough, Sputum, Dyspnoea, Chest pain, Pharyngalgia, GI, Haemoptysis, Chills | 7                     |
| Göker 2020 [89]         | 23/06/2020 | Turkey          | Retrospective single-centre, case series                  | 186  | Composite endpoint: Intubation, ICU or Mortality            | Undefined                                          | Blood Type                         |                                                                                                                           |                                                                                            | 7                     |
| Giacomelli 2020 [78]    | 22/05/2020 | Italy           | Prospective single-centre, case series                    | 233  | Mortality                                                   | Survived/Recovered                                 | Male, Age, BMI, Smoking            | Any comorbidity                                                                                                           | Fever, Cough, Dyspnoea, Nausea                                                             | Haemoglobin Levels 10 |
| Grasselli 2020 [79]     | 28/04/2020 | Italy           | Retrospective multi-centre, case series                   | 1591 | Mortality                                                   | Discharged or still in ICU                         | Age                                | Hypertension                                                                                                              |                                                                                            | 6                     |
| Guan 2020 [29]          | 14/05/2020 | China           | Retrospective multi-centre, case series                   | 1590 | Composite endpoint: ICU, Intubation or Mortality            | Non-ICU or survivor                                |                                    | Any comorbidity, Hypertension, CVD, Diabetes, Cerebrovascular Disease, COPD, Active Cancer, Immunodeficiency, CKD, Others |                                                                                            | 10                    |
| Gupta 2020 [66]         | 06/08/2020 | United States   | Retrospective multi-centre, case series                   | 2215 | Mortality within 28 day of ICU admission                    | Survival within 28 day of ICU admission            | Male, Age, BMI, Smoking, Ethnicity | Any comorbidity, Hypertension, CVD, Diabetes, Chronic Lung Disease, Asthma, COPD, Active Cancer, Immunodeficiency, CKD    | Fever, Fatigue, Cough, Sputum, Nausea                                                      | 9                     |
| Hajifathalian 2020 [67] | 05/08/2020 | United States   | Retrospective multi-centre, case series                   | 770  | Composite endpoint: ICU or Mortality                        | Non-ICU or survivor                                | Age, BMI, Ethnicity                |                                                                                                                           |                                                                                            | 10                    |

| <b>Table 1. Summary of studies</b> |            |               |                                          |      |                                                                                                                                                                   |                                                                                                              |                          |                                                                                                                                                          |                                                                                                             |    |
|------------------------------------|------------|---------------|------------------------------------------|------|-------------------------------------------------------------------------------------------------------------------------------------------------------------------|--------------------------------------------------------------------------------------------------------------|--------------------------|----------------------------------------------------------------------------------------------------------------------------------------------------------|-------------------------------------------------------------------------------------------------------------|----|
| Hou 2020 [87]                      | 23/06/2020 | South Korea   | Retrospective single-centre, case series | 211  | Progression to severe stage COVID-19                                                                                                                              | Asymptomatic or mildly symptomatic patients who were discharged                                              | Male, Age                | Hypertension, Diabetes                                                                                                                                   | Fever, Myalgia, Cough, Sputum, Dyspnoea, Chest pain, Diarrhoea, Pharyngalgia, Headache, Chills, Rhinorrhoea | 10 |
| Huang 2020 [30]                    | 08/05/2020 | China         | Retrospective multi-centre, case series  | 202  | Severe disease (5th ed. COVID-19 guidelines NHC)                                                                                                                  | Non-severe disease (5th ed. COVID-19 guidelines NHC)                                                         | Male, Age, BMI, Smoking  | Any comorbidity, Hypertension, Chronic Heart Disease, Diabetes                                                                                           | Fever, Fatigue, Cough, Dyspnoea, Pharyngalgia                                                               | 9  |
| Huang 2020 [31]                    | 01/06/2020 | China         | Retrospective multi-centre, case series  | 310  | 1. Severe (5th ed. COVID-19 guidelines NHC)<br>2. Mortality                                                                                                       | 1. Non-severe<br>2. Survival                                                                                 | Male, Age                | Hypertension                                                                                                                                             | Nausea                                                                                                      | 10 |
| Imam 2020 [68]                     | 04/06/2020 | United States | Retrospective multi-centre, case series  | 1305 | Mortality                                                                                                                                                         | Survived/Recovered                                                                                           | Male, Age, Smoking       | Hypertension, CVD, Diabetes, Cerebrovascular Disease, Chronic Liver Disease, Asthma, COPD, Sleep Apnoea, Active Cancer, Immunosuppression, CKD, Dementia |                                                                                                             | 10 |
| Israelsen 2020 [91]                | 15/05/2020 | Denmark       | Retrospective single-centre, case series | 175  | ICU                                                                                                                                                               | General ward treatment                                                                                       |                          |                                                                                                                                                          |                                                                                                             | 6  |
| Itelman 2020 [93]                  | 01/05/2020 | Israel        | Retrospective single-centre, case series | 162  | Severe - defined as requiring intensive help for proper oxygenation (high-flow oxygen delivery device or artificial ventilation, either non-invasive or invasive) | Mild or Moderate disease (flu-like without clinical and imaging signs of pneumonia; pneumonia and hypoxemia) | Male                     | Hypertension, Chronic Heart Disease, Diabetes                                                                                                            |                                                                                                             | 4  |
| Jin 2020 [32]                      | 01/06/2020 | China         | Retrospective multi-centre, case series  | 651  | Severe/Critical disease (6th ed. COVID-19 guidelines NHC)                                                                                                         | Mild/Moderate disease (6th ed. COVID-19 guidelines NHC)                                                      |                          |                                                                                                                                                          | Sputum, GI                                                                                                  | 9  |
| Kalligeros 2020 [69]               | 02/06/2020 | United States | Retrospective multi-centre,              | 103  | 1. ICU admission within the first 10                                                                                                                              | 1. No ICU admission within the first 10 days                                                                 | Male, Age, BMI, Smoking, | Hypertension, Chronic Heart                                                                                                                              |                                                                                                             | 10 |

| Table 1. Summary of studies    |            |                  |                                                |        |                                                                                                                 |                                       |                                                             |                                                                                                                                      |                                    |    |
|--------------------------------|------------|------------------|------------------------------------------------|--------|-----------------------------------------------------------------------------------------------------------------|---------------------------------------|-------------------------------------------------------------|--------------------------------------------------------------------------------------------------------------------------------------|------------------------------------|----|
|                                |            |                  | case series                                    |        | days<br>2. IMV during the<br>first 10 days                                                                      | 2. No IMV during the first 10<br>days | Ethnicity                                                   | Disease, Diabetes,<br>Chronic Lung<br>Disease                                                                                        |                                    |    |
| Kammar-<br>García 2020<br>[86] | 25/05/2020 | Mexico           | Retrospective<br>multi-centre,<br>case series  | 13842  | 1. Mortality<br>2. Composite<br>endpoint:<br>Hospitalization,<br>pneumonia,<br>intubation, and ICU<br>admission | 1. Survival<br>2. Outpatient          | BMI                                                         | Hypertension, CVD,<br>Diabetes, Asthma,<br>COPD,<br>Immunosuppression,<br>CKD                                                        | 9                                  |    |
| Kim 2020 [70]                  | 16/07/2020 | United<br>States | Retrospective<br>multi-centre,<br>case series  | 2,490  | 1. ICU<br>2. Mortality                                                                                          | Hospitalisation without event         | Male, Age,<br>BMI, Smoking,<br>Ethnicity                    | Hypertension, CVD,<br>Diabetes, Chronic<br>Lung Disease,<br>Immunosuppression,<br>CKD, Neurological<br>Disease, Rheumatic<br>Disease | 10                                 |    |
| Lassale 2020<br>[83]           | 01/06/2020 | UK               | Retrospective<br>multi-centre,<br>cohort study | 428494 | Hospitalisation                                                                                                 | Non-hospitalised                      | Male, Age,<br>BMI, Smoking,<br>Ethnicity,<br>Alcohol Intake | Hypertension, CVD,<br>Chronic Lung<br>Disease                                                                                        | 10                                 |    |
| Latz 2020 [71]                 | 12/07/2020 | United<br>States | Retrospective<br>multi-centre,<br>case series  | 1289   | Composite<br>endpoint: intubation<br>and death                                                                  | Hospitalisation without event         | Blood Type                                                  |                                                                                                                                      | 10                                 |    |
| Lee 2020 [88]                  | 06/05/2020 | Korea            | Retrospective<br>multi-centre,<br>case series  | 3191   | Severe and critical<br>disease (Daegu<br>Severity Score for<br>COVID-19)                                        | Mild & moderate disease               |                                                             | Loss of<br>smell/taste                                                                                                               | 6                                  |    |
| Li 2020 [96]                   | 08/04/2020 | China            | Retrospective<br>multi-centre,<br>case series  | 132    | Mortality                                                                                                       | Survived/Recovered                    | Male, Age                                                   |                                                                                                                                      | 10                                 |    |
| Li 2020 [34]                   | 29/05/2020 | China            | Retrospective<br>single-centre,<br>case series | 453    | Mortality                                                                                                       | Survived/Recovered                    |                                                             | Diabetes                                                                                                                             | 9                                  |    |
| Li 2020 [35]                   | 11/06/2020 | China            | Retrospective<br>multi-centre,<br>case series  | 1449   | Mortality                                                                                                       | Survived/Recovered                    | Male, Age,<br>Smoking                                       | Fatigue,<br>Myalgia, Cough,<br>Sputum,<br>Dyspnoea,<br>Nausea,<br>Diarrhoea,<br>Headache, Chills                                     | Haemoglobin<br>Levels              | 6  |
| Liang 2020<br>[36]             | 12/05/2020 | China            | Retrospective<br>multi-centre,                 | 1590   | Composite<br>endpoint: ICU,                                                                                     | Hospitalisation without event         | Male, Age,<br>Smoking                                       | Any comorbidity,<br>Hypertension, CVD,                                                                                               | Fever, Fatigue,<br>Myalgia, Cough, | 10 |

**Table 1.** Summary of studies

|                          |            |                  | case series                                    |      | ventilation, or death                                                            |                                               |                                                             | Diabetes,<br>Cerebrovascular<br>Disease, COPD,<br>Active Cancer, CKD                                                                            | Dyspnoea,<br>Pharyngalgia,<br>Headache,<br>Haemoptysis,<br>Chills,<br>Unconsciousness |                                                              |    |
|--------------------------|------------|------------------|------------------------------------------------|------|----------------------------------------------------------------------------------|-----------------------------------------------|-------------------------------------------------------------|-------------------------------------------------------------------------------------------------------------------------------------------------|---------------------------------------------------------------------------------------|--------------------------------------------------------------|----|
| Liu 2020 [38]            | 14/04/2020 | China            | Retrospective<br>single-centre,<br>case series | 140  | Severe (7th ed.<br>COVID-19<br>guidelines NHC)                                   | Mild disease                                  | Male, Age                                                   | Hypertension, CVD                                                                                                                               | Fever, Fatigue,<br>Myalgia, Cough,<br>Dyspnoea, Chest<br>pain, Anorexia               | 6                                                            |    |
| Liu 2020 [37]            | 27/04/2020 | China            | Retrospective<br>single-centre,<br>case series | 134  | Severe (7th ed.<br>COVID-19<br>guidelines NHC &<br>American Thoracic<br>Society) | Non-severe disease                            | Male                                                        | Hypertension,<br>Diabetes                                                                                                                       | Fever, Fatigue,<br>Cough, Sputum,<br>Anorexia                                         | 8                                                            |    |
| Masetti 2020<br>[80]     | 14/06/2020 | Italy            | Retrospective<br>single-centre,<br>case series | 229  | Mortality                                                                        | Discharged survivors                          | Male, Age                                                   | Any comorbidity,<br>Hypertension,<br>Chronic Heart<br>Disease, Diabetes,<br>COPD, Active<br>Cancer, CKD                                         |                                                                                       | 9                                                            |    |
| Nowak 2020<br>[95]       | 18/05/2020 | Poland           | Retrospective<br>single-centre,<br>case series | 169  | Mortality                                                                        | Survived/Recovered                            | Male, Age                                                   | Hypertension, CVD,<br>Diabetes, COPD,<br>Active Cancer,<br>CKD, Others                                                                          | Fever, Fatigue,<br>Cough,<br>Dyspnoea,<br>Nausea,<br>Diarrhoea                        | 8                                                            |    |
| Okoh 2020<br>[72]        | 10/06/2020 | United<br>States | Retrospective<br>single-centre,<br>case series | 251  | Mortality                                                                        | Survived/Recovered                            | Male, Age,<br>Ethnicity                                     | Hypertension, CVD,<br>Diabetes,<br>Cerebrovascular<br>Disease, COPD,<br>Active Cancer, CKD                                                      | Fever                                                                                 | Respiratory<br>Rate, Heart<br>Rate,<br>Haemoglobin<br>Levels | 9  |
| Palaiodimos<br>2020 [73] | 15/05/2020 | United<br>States | Retrospective<br>single-centre,<br>case series | 200  | 1. Increasing<br>Oxygen<br>2. Intubation<br>3. Mortality                         | ICU admission without event                   | Male, Age,<br>BMI, Smoking,<br>Ethnicity,<br>Alcohol Intake | Hypertension, CVD,<br>Diabetes,<br>Cerebrovascular<br>Disease, Asthma,<br>COPD, Sleep<br>Apnoea, Active<br>Cancer,<br>Immunosuppression,<br>CKD |                                                                                       |                                                              | 9  |
| Pei 2020 [39]            | 29/05/2020 | China            | Retrospective<br>single-centre,<br>case series | 333  | Severe/Critical (7th<br>ed. COVID-19<br>guidelines NHC)                          | Moderate (7th ed. COVID-19<br>guidelines NHC) | Male                                                        | Hypertension,<br>Diabetes                                                                                                                       | Fever, Cough,<br>Dyspnoea,<br>Diarrhoea                                               | 6                                                            |    |
| Petrilli 2020            | 01/05/2020 | United           | Retrospective                                  | 5279 | 1. Hospitalisation                                                               | Non-hospitalised; alive                       | Male, Age,                                                  | Hypertension, CVD,                                                                                                                              | Fever, Fatigue                                                                        | Oxygen                                                       | 10 |

| Table 1. Summary of studies |            |               |                                          |      |                                                                                                                          |                                        |                           |                                                                         |                                                                                                                        |                          |
|-----------------------------|------------|---------------|------------------------------------------|------|--------------------------------------------------------------------------------------------------------------------------|----------------------------------------|---------------------------|-------------------------------------------------------------------------|------------------------------------------------------------------------------------------------------------------------|--------------------------|
| [74]                        |            | States        | single-centre, case series               |      | 2. Composite endpoint: intensive care unit, mechanical ventilation, discharge to hospice, or death                       |                                        | BMI, Smoking, Ethnicity   | Diabetes, Asthma, COPD, Active Cancer, CKD, Hyperlipidaemia             | saturation %                                                                                                           |                          |
| Price-Haywood 2020 [75]     | 25/06/2020 | United States | Retrospective multi-centre, case series  | 3481 | 1. Hospitalisation<br>2. Composite endpoint: intensive care unit, mechanical ventilation, discharge to hospice, or death | Non-hospitalised; alive                | Male, Age, BMI, Ethnicity |                                                                         | Respiratory Rate                                                                                                       | 10                       |
| Qin 2020 [40]               | 29/05/2020 | China         | Retrospective multi-centre, case series  | 1875 | 1. Severe<br>2. Mortality                                                                                                | Non-hospitalised; alive                |                           | Cerebrovascular Disease                                                 |                                                                                                                        | 8                        |
| Ramlall 2020 [76]           | 03/08/2020 | United States | Retrospective multi-centre, case series  | 6393 | 1. Intubation<br>2. Mortality                                                                                            | Hospitalisation without event          | Age, BMI, Smoking         | Hypertension, CVD, Diabetes, Coagulation disorder, Macular Degeneration | Cough                                                                                                                  | 10                       |
| Ren 2020 [41]               | 11/05/2020 | China         | Retrospective single-centre, case series | 151  | Severe (6th ed. COVID-19 guidelines NHC)                                                                                 | Mild (6th ed. COVID-19 guidelines NHC) | Male                      | Hypertension, CVD, Diabetes                                             | Fever, Fatigue, Cough, Sputum, Dyspnoea, Nausea, Diarrhoea, Anorexia                                                   | 10                       |
| Ruan 2020 [42]              | 03/03/2020 | China         | Retrospective single-centre, case series | 150  | Mortality                                                                                                                | Survived/Recovered                     | Male                      | Hypertension, CVD, Diabetes, Cerebrovascular Disease                    | Fever, Fatigue, Myalgia, Cough, Sputum, Dyspnoea                                                                       | 5                        |
| Shahriarirad 2020 [94]      | 18/06/2020 | Iran          | Retrospective single-centre, case series | 113  | 1. Severe (American Thoracic Society)<br>2. Mortality                                                                    | Non-severe; alive                      | Male                      | Hypertension, CVD, Diabetes                                             | Fever, Fatigue, Myalgia, Cough, Sputum, Dyspnoea, Chest pain, Nausea, Diarrhoea, Headache, Dizziness, Chills, Anorexia | Oxygen saturation %<br>6 |
| Shi 2020 [43]               | 18/03/2020 | China         | Retrospective single-centre,             | 487  | Severe (undefined)                                                                                                       | Mild (undefined)                       | Male, Age                 | Hypertension                                                            |                                                                                                                        | 9                        |

| Table 1. Summary of studies |            |               |                                           |            |                                                           |                                    |                                    |                                                                                                 |                                                                                                           |                  |    |
|-----------------------------|------------|---------------|-------------------------------------------|------------|-----------------------------------------------------------|------------------------------------|------------------------------------|-------------------------------------------------------------------------------------------------|-----------------------------------------------------------------------------------------------------------|------------------|----|
|                             |            |               | case series                               |            |                                                           |                                    |                                    |                                                                                                 |                                                                                                           |                  |    |
| Shi 2020 [44]               | 28/04/2020 | China         | Retrospective multi-centre, case series   | 306        | Mortality                                                 | Survived/Recovered                 | Male                               | Hypertension, CVD                                                                               | Fever, Fatigue, Cough, Dyspnoea, Anorexia                                                                 |                  | 5  |
| Simonnet 2020 [92]          | 09/04/2020 | France        | Retrospective single-centre, cohort study | 124        | Ventilation                                               | ICU with no mechanical ventilation | Male, Age, BMI                     | Hypertension, Diabetes                                                                          |                                                                                                           |                  | 9  |
| Suleyman 2020 [77]          | 16/06/2020 | United States | Retrospective single-centre, case series  | 463        | 1. Hospitalisation<br>2. ICU<br>3. Mechanical ventilation | Hospitalisation without event      | Male, Age, BMI, Smoking, Ethnicity | Hypertension, CVD, Diabetes, Asthma, COPD, Sleep Apnoea, Active Cancer, CKD                     | Fever, Myalgia, Cough, Dyspnoea, Nausea, Diarrhoea, Headache, Loss of smell/taste, Anorexia               | Respiratory Rate | 10 |
| Wang 2020 [47]              | 20/02/2020 | China         | Retrospective single-centre, case series  | 138        | ICU                                                       | Non-ICU                            | Male                               | Any comorbidity, Hypertension, CVD, Diabetes, Cerebrovascular Disease, COPD, Active Cancer, CKD | Fatigue, Myalgia, Cough, Sputum, Dyspnoea, Nausea, Diarrhoea, Pharyngalgia, Headache, Dizziness, Anorexia |                  | 6  |
| Wang 2020 [46]              | 30/03/2020 | China         | Retrospective single-centre, case series  | 339        | Mortality                                                 | Survived/Recovered (at 4 weeks)    | Male                               | Hypertension, CVD, Diabetes, Cerebrovascular Disease, COPD                                      | Fever, Fatigue, Cough, Sputum, Dyspnoea, Diarrhoea, Anorexia                                              |                  | 7  |
| Wang 2020 [45]              | 08/04/2020 | China         | Retrospective single-centre, case series  | 344        | Mortality                                                 | Survived/Recovered                 | Male, Age                          | Hypertension, CVD, Diabetes, COPD                                                               | Fever, Fatigue, Cough, Sputum, Dyspnoea, Diarrhoea, Anorexia                                              |                  | 10 |
| Wang 2020 [48]              | 11/04/2020 | China         | Retrospective single-centre, case series  | 125        | Critical (5th ed. COVID-19 guidelines NHC)                | Non-critical                       | Male                               | Any comorbidity                                                                                 |                                                                                                           |                  | 9  |
| Wang 2020 [49]              | 30/04/2020 | China         | Retrospective single-centre, case series  | 107        | Mortality                                                 | Survived/Recovered                 | Male, Age                          | Hypertension, CVD                                                                               |                                                                                                           |                  | 7  |
| Williamson                  | 08/07/2020 | UK            | Retrospective                             | 17,278,392 | Mortality                                                 | Survived/Recovered                 | Male, Age,                         | Hypertension,                                                                                   |                                                                                                           |                  | 8  |

**Table 1.** Summary of studies

|                |            |       |                                          |      |                                                                       |                                        |                         |                                                                                                                                                                                                                                         |                                                                                                          |                                                                                             |    |
|----------------|------------|-------|------------------------------------------|------|-----------------------------------------------------------------------|----------------------------------------|-------------------------|-----------------------------------------------------------------------------------------------------------------------------------------------------------------------------------------------------------------------------------------|----------------------------------------------------------------------------------------------------------|---------------------------------------------------------------------------------------------|----|
| 2020 [84]      |            |       | multi-centre, cohort study               |      |                                                                       |                                        | BMI, Smoking, Ethnicity | Chronic Heart Disease, Diabetes, Cerebrovascular Disease, Chronic Liver Disease, Chronic Lung Disease, Asthma, Active Cancer, Immunosuppression, CKD, Dementia, Neurological Disease, Transplant history, Rheumatic Disease, Chronic GI |                                                                                                          |                                                                                             |    |
| Wu 2020 [50]   | 19/05/2020 | China | Retrospective single-centre, case series | 1048 | Composite endpoint: ICU, mechanical ventilation, or death             |                                        |                         | COPD                                                                                                                                                                                                                                    |                                                                                                          |                                                                                             | 9  |
| Xie 2020 [51]  | 13/04/2020 | China | Retrospective single-centre, case series | 140  | Mortality                                                             | Survived/Recovered                     |                         | Any comorbidity, Hypertension                                                                                                                                                                                                           | Dyspnoea                                                                                                 | Oxygen saturation %                                                                         | 8  |
| Yan 2020 [52]  | 06/04/2020 | China | Retrospective single-centre, case series | 193  | Mortality                                                             | Survived/Recovered                     |                         | Male                                                                                                                                                                                                                                    | Hypertension, Diabetes                                                                                   |                                                                                             | 6  |
| Yang 2020 [53] | 25/05/2020 | China | Retrospective single-centre, case series | 200  | ICU                                                                   | Non-ICU                                |                         | Male, Age, Smoking                                                                                                                                                                                                                      | Any comorbidity, Hypertension, Chronic Heart Disease, Diabetes, Chronic Lung Disease, Active Cancer, CKD | Fever, Fatigue, Myalgia, Cough, Dyspnoea, Nausea, Diarrhoea, Pharyngalgia, Headache, Chills | 7  |
| Yao 2020 [54]  | 24/04/2020 | China | Retrospective single-centre, case series | 108  | Severe (American Thoracic Society)                                    | Non-severe (American Thoracic Society) |                         | Male, Age, Smoking                                                                                                                                                                                                                      | Any comorbidity, Hypertension, CVD, Diabetes, Chronic Liver Disease                                      | Fever, Fatigue, Cough, Sputum, Dyspnoea, Diarrhoea                                          | 10 |
| Ye 2020 [55]   | 13/06/2020 | China | Retrospective multi-centre, case series  | 856  | 1. Severe (6th ed. COVID-19 guidelines NHC)<br>2. ICU<br>3. Mortality | Mild; hospitalised non-event           |                         | Any comorbidity, Hypertension, Chronic Heart Disease, Diabetes, Active Cancer, CKD, Viral Hepatitis, Others                                                                                                                             |                                                                                                          |                                                                                             | 10 |
| Yu 2020 [56]   | 27/04/2020 | China | Retrospective multi-centre,              | 421  | Composite severity outcome (ICU,                                      | No composite endpoint                  |                         | Male, Age                                                                                                                                                                                                                               | Hypertension, Chronic Heart                                                                              | Fever, Cough, Sputum                                                                        | 9  |

| Table 1. Summary of studies |            |       |                                          |     |                                                                                              |                                                                                                    |                    |                                                                                                                                 |                                                                                                      |                                                   |    |
|-----------------------------|------------|-------|------------------------------------------|-----|----------------------------------------------------------------------------------------------|----------------------------------------------------------------------------------------------------|--------------------|---------------------------------------------------------------------------------------------------------------------------------|------------------------------------------------------------------------------------------------------|---------------------------------------------------|----|
|                             |            |       | case series                              |     | ARDS, or shock)                                                                              |                                                                                                    |                    | Disease, Diabetes                                                                                                               |                                                                                                      |                                                   |    |
| Zhang 2020 [59]             | 15/03/2020 | China | Retrospective multi-centre, case series  | 645 | Severe / Critical (5th ed. COVID-19 guidelines NHC)                                          | Mild to moderate disease (5th ed. COVID-19 guidelines NHC)                                         | Male               | Any comorbidity                                                                                                                 | Fever, Fatigue, Myalgia, Cough, Sputum, Dyspnoea, Nausea, Diarrhoea, Pharyngalgia                    |                                                   | 10 |
| Zhang 2020 [57]             | 05/04/2020 | China | Retrospective single-centre, case series | 221 | Severe (American Thoracic Society)                                                           | Non-severe (American Thoracic Society)                                                             | Male, Age          | Any comorbidity, Hypertension, CVD, Cerebrovascular Disease, Chronic Liver Disease, COPD, Active Cancer, Immunosuppression, CKD | Fever, Fatigue, Cough, Dyspnoea, Chest pain, Diarrhoea, Pharyngalgia, Headache, Anorexia             |                                                   | 8  |
| Zhang 2020 [58]             | 15/04/2020 | China | Retrospective single-centre, case series | 663 | 1. Severe COVID-19 (National Health Commission definition (trial version 5))<br>2. Mortality | 1. Mild/Moderate COVID-19 (National Health Commission definition (trial version 5))<br>2. Survival | Male, Age          | CVD, Chronic Lung Disease, Active Cancer, Endocrine System Disease, Endocrine System Disease, Chronic GI                        | Fever, Fatigue, Myalgia, Cough, Sputum, Dyspnoea, Chest pain, Nausea, Diarrhoea, Headache, Dizziness | Haemoglobin Levels                                | 9  |
| Zhang 2020 [60]             | 26/04/2020 | China | Retrospective single-centre, case series | 111 | Composite endpoint: ICU or death.                                                            | Discharge                                                                                          | Male               | Any comorbidity, Hypertension, Diabetes                                                                                         | Fever, Fatigue, Myalgia, Cough, Dyspnoea, Chest pain, Diarrhoea                                      | Respiratory Rate                                  | 10 |
| Zheng 2020 [97]             | 24/03/2020 | China | Retrospective single-centre, case series | 161 | Severe COVID-19 (National Health Commission definition (trial version 5))                    | Non-severe COVID-19 (National Health Commission definition (trial version 5))                      | Male               | Hypertension, CVD, Diabetes, Cerebrovascular Disease, COPD                                                                      | Fever, Fatigue, Myalgia, Cough, Dyspnoea, Diarrhoea, Headache                                        |                                                   | 7  |
| Zhou 2020 [14]              | 09/03/2020 | China | Retrospective single-centre, case series | 191 | Mortality                                                                                    | Survived/Recovered                                                                                 | Male, Age, Smoking | Any comorbidity, Hypertension, CVD, Diabetes, Chronic Lung Disease, Other                                                       | Fever, Fatigue, Myalgia, Cough, Sputum, Nausea, Diarrhoea                                            | Respiratory Rate, Haemoglobin Levels              | 10 |
| Zhou 2020 [62]              | 18/05/2020 | China | Retrospective single-centre, case series | 366 | Severe (American Thoracic Society)                                                           | Non-severe (American Thoracic Society)                                                             | Male, Age          | Hypertension, COPD, Diabetes                                                                                                    | Fever, Fatigue, Cough, Dyspnoea                                                                      | Respiratory Rate, Heart Rate, Oxygen saturation % | 9  |



**Table 1.** Summary of studies included in quantitative synthesis. Abbreviations: ARDS, Acute respiratory distress syndrome; BMI, Body Mass Index; COPD, Chronic Obstructive Pulmonary Disease; CKD, Chronic Kidney Disease; CVD, Cardiovascular Disease; GI, Gastrointestinal; HIV, Human Immunodeficiency Virus; ICU, Intensive Care Unit; IMV, invasive mechanical intubation; mNOS, modified Newcastle Ottawa Scale; NHC, National Health Commission

Meta-analysis regression was carried out to investigate the pooled risk estimates of selected factors for severe outcome. Analysed patient characteristics included age >75, male sex, and severe obesity (BMI>40) (Fig. 2). Age >75 years old was an important factor contributing to severe outcomes in COVID-19 (OR = 2.65 (1.81–3.90),  $I^2 = 51\%$ ). Males had higher risk compared to females (OR = 2.05 (1.39–3.04),  $I^2 = 75\%$ ). Severely obese individuals were at higher risk compared to non-severely obese individuals (OR = 2.57 (1.31–5.05),  $I^2 = 39\%$ ). When considering mortality as the outcome, the risk associated with age >75 is elevated further (OR = 5.57 (3.10–10.00),  $I^2 = 28\%$ ) (S1 Fig.).

**Fig. 2.** Forest plot for the association of patient characteristics (age, sex, and severe obesity) with severe outcomes from COVID-19 using a random-effects model.

The risk associated with pre-existing conditions including hypertension, diabetes, active cancer, and chronic kidney disease (CKD) was also investigated using meta-analysis (Fig. 3). Active cancer (OR = 1.46 (1.04–2.04),  $I^2 = 0\%$ ) was associated with increased risk of severe outcome. Diabetes (OR = 1.99 (0.92–4.29),  $I^2 = 43\%$ ), Hypertension (OR = 1.33 (0.99–1.80),  $I^2 = 63\%$ ), and CKD (OR = 1.27 (0.70–2.29),  $I^2 = 88\%$ ) showed no significant elevated risk. Forest plots showing meta-analysis regression for the relative risk of mortality conferred by hypertension, diabetes, and active cancer are reported in S2 Fig. To highlight the heterogeneity of reported outcomes in included studies, all reported risk estimates for male sex, diabetes and hypertension as presented as an example in the supplementary material (S3 Fig., S4 Fig. and S5 Fig. respectively).

**Fig. 3.** Forest plot for the association of comorbidities (diabetes, hypertension, chronic kidney disease, and active cancer) with severe outcomes from COVID-19 using a random-effects model.

Due to the heterogeneity of studies and insufficient comparable data, it was not possible to conduct meta-regression on all reported variables, including symptoms and vitals measurements. As such, pooled weighted estimates were extracted where possible (Table 2). Further patient characteristics such as blood type A and smoking history shows trends towards elevated risk for severe outcome (OR = 1.45, OR = 1.42, respectively). A number of symptoms suggested elevated risk of severe outcome including myalgia (4.82), sputum production (11.40), dyspnoea (8.68), nausea (15.55), and chills (6.32). Fever showed low estimated risk for both severity and mortality (1.06, 0.69 respectively). There was insufficient comparable data to estimate risk for cough as an independent factor, however, pooling univariate analysis also found low estimated risk for both severity and mortality (1.01, 1.08 respectively). There was limited evidence on loss of smell as a risk factor for severe outcomes [88].

**Table 2. Pooled risk estimates**

|                                           | Multivariate |           | Univariate |           |
|-------------------------------------------|--------------|-----------|------------|-----------|
|                                           | Severe       | Mortality | Severe     | Mortality |
| <b>Patient characteristics</b>            |              |           |            |           |
| Male                                      | 1.17         | 1.87      | 1.62       | 1.94      |
| Age                                       |              |           |            |           |
| >60                                       | 1.69         | 3.15      | 3.75       | 3.04      |
| >65                                       | 1.76         | 3.79      | 2.14       | 1.89      |
| >75                                       | 1.93         | 5.82      | -          | 2.41      |
| BMI                                       |              |           |            |           |
| Obesity                                   | 1.69         | 1.45      | 2.02       | -         |
| Severe Obesity                            | 2.07         | 1.51      | 1.80       | -         |
| Smoking                                   |              |           |            |           |
| Active                                    | 1.01         | 1.21      | 1.22       | 2.13      |
| Former                                    | 1.31         | -         | 1.26       | 0.56      |
| History                                   | 1.42         | 0.83      | 0.79       | 2.06      |
| Blood group                               |              |           |            |           |
| O                                         | 0.68         | -         | 1.14       | -         |
| A                                         | 1.45         | -         | 1.32       | -         |
| <b>Comorbidities</b>                      |              |           |            |           |
| Any condition                             | 17.48        | -         | 2.92       | 3.24      |
| Hypertension                              | 1.03         | 1.09      | 3.73       | 2.44      |
| Cardiovascular Disease                    | 1.09         | 1.53      | 3.37       | 4.04      |
| Chronic arterial disease                  | 0.94         | 2.14      | 2.71       | 2.85      |
| Heart Failure                             | 1.93         | 1.43      | 2.23       | 1.91      |
| Chronic Heart Disease                     | 1.52         | -         | 2.24       | 5.75      |
| Chronic Lung Disease                      | 1.52         | 1.39      | 3.54       | 5.35      |
| Asthma                                    | 0.75         | -         | 0.97       | 0.85      |
| COPD                                      | 1.01         | 2.05      | 2.47       | 2.68      |
| Active Cancer                             | 1.48         | 2.15      | 3.19       | 2.40      |
| Immunosuppression                         | 1.20         | -         | 1.17       | 2.31      |
| Chronic Kidney disease                    | 1.39         | 1.15      | 3.50       | 2.79      |
| <b>Symptoms</b>                           |              |           |            |           |
| Fever                                     | 1.06         | 0.69      | 1.98       | 0.83      |
| Fatigue                                   | -            | 0.86      | 1.74       | 1.33      |
| Myalgia                                   | 4.82         | -         | 0.82       | 1.17      |
| Cough                                     | -            | -         | 1.58       | 0.90      |
| Sputum production                         | 11.40        | -         | 1.19       | 1.33      |
| Dyspnoea                                  | 8.68         | -         | 7.32       | 3.21      |
| Chest pain                                | -            | -         | 2.41       | 2.23      |
| Nausea                                    | 15.55        | -         | 1.37       | 0.72      |
| Diarrhoea                                 | -            | -         | 1.20       | 0.89      |
| Pharyngalgia                              | -            | -         | 1.25       | 0.70      |
| Headache                                  | -            | -         | 0.96       | 0.95      |
| Dizziness                                 | -            | -         | 6.15       | 1.32      |
| GI Symptoms                               | -            | -         | 3.36       | 1.38      |
| Chills                                    | 6.32         | -         | 1.01       | 2.08      |
| Loss of smell/taste                       | -            | -         | 1.71       | -         |
| Rhinorrhoea                               | -            | -         | 1.15       | -         |
| Anorexia                                  | -            | -         | 3.13       | 1.13      |
| <b>Symptoms</b>                           |              |           |            |           |
| Respiratory rate ( $\geq 24$ breaths/min) | -            | -         | 11.60      | 4.50      |

**Table 2.** Pooled risk estimates for patient characteristics, comorbidities, and symptoms with adverse outcomes of patients with COVID-19.

Respiratory rate  $\geq 24$  breaths/min was reported as a risk in five studies [23,44,48,65,72]. However, it was not possible to combine data and provide estimates for risk due to heterogeneous outcomes and risk measures reported, with a wide range in the effect estimates (OR = 1.74 (0.95-3.18) vs OR = 11.60 (3.34-40.27)). The only study carrying out multivariable analysis for respiratory rate  $\geq 24$  breaths/min found increased risk with reported OR of 2.00 (1.34-2.99) [65]. Similarly, there was insufficient data to report pooled estimates for oxygen saturation. Two studies reported multivariate analysis for mortality as outcome, showing increased risk with decreasing oxygen saturation, SpO<sub>2</sub> 88-92% (OR = 1.46 (1.18-1.79)) and SpO<sub>2</sub> <88% (OR = 2.00 (1.61-2.48)) [74]. Xie et al. report that SpO<sub>2</sub>  $\leq 90\%$  was strongly associated with death, independently of age and sex (Hazard Ratio, 47.41 (6.29 - 357.48) [51]. Univariate analysis also showed increased risk of severe outcome

with SpO<sub>2</sub> on admission to hospital <90% (OR = 3.83 (1.05-14.01)) [94] and <93% (OR = 13.12 (7.11-24.24)) [23].

## Quality assessment

Methodological structure and reporting of studies varied in quality. Quality scores were evaluated using an adapted version of the NOS [16], with an average quality score of 8.4 (SD = 1.7), ranging between 4 and 10 (scale out of 10) (Table 1). All studies reported data collection from health records. Subject inclusion in reported literature was widely reported as hospital admission with positive RT-PCR test and, therefore, most studies show bias towards inclusion of hospitalised, thus more severe, patients. Few studies reported handling of missing data and bias reporting in findings.

## Publication bias

Due to the high volume of published literature, we did not include publications in grey literature such as medRxiv and bioRxiv. Due to high heterogeneity and spread of data, we estimate risk of bias based on the most commonly reported variable: male sex (Fig. 4).

**Figure 4.** Funnel plot highlighting publication bias for male sex as risk factor for severe COVID-19 outcome. 1 = Petrilli et al., 2020; 2 = Lassale et al., 2020; 3 = Price-Haywood et al., 2020; 4 = Huang et al., 2020b; 5 = Suleyman et al., 2020; 6 = Kalligeros et al., 2020; 7 = Simonnet et al., 2020; 8 = Palaiodimos et al., 2020; 9 = Chen et al. 2020; 10 = Shi et al., 2020; 11 = Zhang et al, 2020

## Discussion

The findings of this systematic review and meta-analysis add to the growing body of evidence supporting the hypothesis that a large number of patient characteristics, comorbidities, symptoms, and vital signs parameters relate to increased risk of a severe outcome or death due to COVID-19.

Presented results align well with recent systematic reviews investigating risk factors in COVID-19, highlighting that age, sex, obesity, and multiple comorbidities increase the risk of adverse outcomes [33,61,98–100]. This study, however, goes further than previously available literature through our mapping of a wider variety of risk variables, including symptoms and vital signs.

Prior reported literature has made it clear that certain individuals are at higher risk than others. Hence, there has been a concerted effort to profile these high-risk individuals which has resulted in the development of a variety of diagnostic and prognostic models for COVID-19, with many reporting moderate to excellent discrimination [36,85]. Interpretation of early models, however, should be treated with caution as a result of the high risk of bias due to overfitting, lack of external validation, low representativeness of targeted populations, and subjective/proxy outcomes in criteria for hospitalisation and treatment [100,101]. These performance estimates may be misleading and, potentially, even harmful [100]. Efforts for future development of risk

profiling should follow standardised approaches such as the TRIPOD (Transparent reporting of a multivariable prediction model for individual prognosis or diagnosis) reporting guideline [102].

The identified risk factors align with current understanding of clinical pathophysiology for severe COVID-19. There are several theories as to why age is a significant risk factor for severe COVID-19. These include the role of comorbidities, as well as decreased efficiency of the immune system related to normal ageing [103]. Male sex as a risk factor for severe disease is thought to result from a combination of the effect of health behaviours, sex hormone-mediated immune responses, and differential expression of ACE2 between sexes [104]. Obesity is a risk factor for development of comorbidities such as hypertension, CVD, and diabetes. However, there may be further involvement of obesity through metabolic consequences, which include increased circulating cytokine levels [105].

One study included in this review stands out due to its scale, investigating the primary care records of over 17 million UK citizens [84]. Using a database of overwhelmingly unexposed individuals, the study can be differentiated from ours in that the risk associated with each variable confounds propensity for infection with the relative likelihood of death once infected. The resulting net risk weighting makes it unclear which of these two discrete probabilities is being affected by each variable. The limitation of this approach can be seen best with smoking status whereby the combined approach outputs a protective weighting, potentially due to the reported reduced infection risk conferred by active smoking, contrasting with our analysis which suggests increased prognostic risk (0.91 vs 1.21) [106]. Moreover, as the increased mortality risk of comorbidities was public knowledge before the first wave in the UK, it could be assumed that this demographic behaved more cautiously, resulting in the risk weightings being underestimated in the combined approach. Weightings for hypertension (0.88 [0.84–0.92] vs 1.08 [0.90–1.30]) and non-haematological cancer (using OpenSAFELY’s highest risk group; diagnosed <1-year ago 1.68 [1.46–1.94] vs our any-timeframe 2.15 [1.41–3.28]) seem to conform to this expectation. Both approaches, however, are uniquely useful in their application and, nevertheless, are largely in alignment in their outputs. Combining the discrete risks presents the foundation for the development of a risk model which can aid with the strategic planning required for health systems and the allocation of their resources. Our approach presents the foundation for a prognostic model which could support healthcare triage and be used on an individual level for comprehension of personal risk should one get infected.

## Limitations

While our study presents pooled findings across 14 geographies and may be considered broadly representative of the pandemic, a number of limitations should be highlighted. The primary limitation is the high heterogeneity of the included studies. Notation of patients' highest level of care may be complex to interpret because such an endpoint is dependent on local policy and resources, which have been evolving in strategy and capacity since the onset of the pandemic. Thus, a recommendation of our study is for the development of standardised protocols for reporting of COVID-19 case series and retrospective analysis. Definition of the non-severe or comparator group is often poorly defined and is likely to result in sample selection bias towards more severe cases. Recent evidence from nationwide blanket testing suggests that 86.1% of individuals who tested positive for COVID-19 had none of the three main indicative symptoms of the illness, such as cough, fever, or a

loss of taste or smell [107]. In the majority of papers presented within this analysis, the individuals were already admitted to hospital, hence there is a strong selection bias towards those more severely affected and, as such, our results may underestimate the degree of risk. To facilitate rapid and widespread implementation of risk stratification, this investigation focused on risk factors that were easily obtainable. As such, we did not consider haematological risk factors within our review. These factors are known to be significant and may be valuable to include as part of risk stratification upon admission to hospital [108].

Confounding factors are highly likely in reported literature and, therefore, multivariate analysis is essential to determine causal risk factors. One such example of this is ethnicity. In our analysis of results, we chose to exclude estimates for risk relating to ethnicity and race due to the complex association of socio-economic factors and comorbidities which may be entangled with ethnicity. In early reports from the UK, there was significant disparity in outcomes for BAME (Black, Asian, and Minority Ethnic) communities [109]. However, in more recent analysis, it was found that the great majority of the increased risk of infection and death from COVID-19 among people from ethnic minorities can be explained by factors such as occupation, postcode, living situation, and pre-existing health conditions [110].

A further limitation of our study is the method used to pool risk estimates. We aimed to maximise the data collected by pulling all available estimates for risk of an associated variable. This method is flawed in that these outcomes are not directly comparable in a rigorous meta-analysis. Thus, caution is advised in interpretation of absolute risk for each variable of interest.

## Implications for future practice

A key finding of the global analysis is the difficulty in combining data reported in the literature. Healthcare systems and researchers are, at present, not providing standardised recording and reporting of health data and outcomes. This heterogeneity in reporting limits the efficacy and impact of broad meta-analysis, as highlighted by the spread of data (Fig. 4). The use of standard case report forms, such as those outlined by the WHO may support this endeavour [111]. At a global level, if such data, anonymised and aggregated at patient level, is made more widely available, this could support the development of robust data-driven risk prediction models [112,113].

At regional and provider levels, evidence-based risk stratification could help plan resources and identify trends that predict areas with increased demand. Hospital admission of severe COVID-19 cases can be expected up to two weeks following onset of symptoms [14,114]. Hence, if risk stratification can be carried out in real-time and incorporate dynamic factors, including symptoms and vital signs, resources such as increased ICU capacity can be allocated strategically. Furthermore, through implementation of remote patient monitoring, patients can remain at home on a ‘virtual ward’ while under clinical observation. Early signs of clinical deterioration can be managed and, as a result, reduce hospital burden [115].

At the patient level, based on the findings of this study, it is recommended that individuals undergo comprehensive screening for risk factors including patient characteristics, detailed comorbidities, and reporting of real-time symptoms and vital sign measurements as part of a COVID-19 risk assessment. While some of the

variables identified in this review are well-known risk factors within the clinical or research domain, it is essential that this information is disseminated to the general public in an easily consumable format with supporting evidence and information. The pandemic has brought about significant social and economic disruption. Due to the lack of a prior evidence-base, current guidelines for individual risk management are blunt, broad generalisations. These may be sensitive to the majority of at-risk individuals, but simultaneously have low specificity, erroneously profiling large sections of the population. Thus, the concern is that many may lose confidence in these measures, including those correctly labelled ‘at-risk’. Providing individual patients with a comprehensive and individualised risk profile may empower individuals and increase engagement with public health messaging. This may facilitate efforts by national governments to encourage behaviour modification at a population level, in a manner which reduces the spread of the virus, thereby limiting socio-economic impact.

## Conclusion

The findings of this paper highlight the range of factors associated with adverse outcomes in COVID-19, across severe disease, ICU admission, IMV, and death. The determination of critical risk factors may support risk stratification of individuals at multiple levels, from government policy, to clinical profiling at hospital admission, to individual behaviour change. This would enable both a more streamlined allocation of resources and provision of support to individuals who require them most. Future studies aimed at developing and validating robust prognostic models should look to follow a standardised approach to allow for comparability and sharing of knowledge. In this respect, a continuation of open data sharing is essential to facilitate improvement of these models.

## References

1. WHO. Weekly epidemiological update - 17 November 2020. World Health Organization; 2020 Nov. Available: <https://www.who.int/publications/m/item/weekly-epidemiological-update---17-november-2020>
2. Young BE, Ong SWX, Kalimuddin S, Low JG, Tan SY, Loh J, et al. Epidemiologic Features and Clinical Course of Patients Infected With SARS-CoV-2 in Singapore. *JAMA*. 2020;323: 1488–1494. doi:10.1001/jama.2020.3204
3. Xu Z, Shi L, Wang Y, Zhang J, Huang L, Zhang C, et al. Pathological findings of COVID-19 associated with acute respiratory distress syndrome. *Lancet Respir Med*. 2020;8: 420–422. doi:10.1016/S2213-2600(20)30076-X
4. Lu X, Wang Y, Chen T, Wang J, Yan F. Classification of COVID-19 in intensive care patients. *Crit Care*. 2020;24: 399. doi:10.1186/s13054-020-03127-7
5. Verity R, Okell LC, Dorigatti I, Winskill P, Whittaker C, Imai N, et al. Estimates of the severity of coronavirus disease 2019: a model-based analysis. *Lancet Infect Dis*. 2020;20: 669–677. doi:10.1016/S1473-3099(20)30243-7

6. Lopez M, Bell K, Annaswamy T, Juengst S, Ifejika N. COVID-19 Guide for the Rehabilitation Clinician: A Review of Nonpulmonary Manifestations and Complications. *Am J Phys Med Rehabil.* 2020;99: 669–673. doi:10.1097/phm.0000000000001479
7. Maxwell E. Living with Covid19. National Institute for Health Research; 2020 Oct. doi:10.3310/themedreview\_41169
8. Sheehy LM. Considerations for Postacute Rehabilitation for Survivors of COVID-19. *JMIR Public Health Surveill.* 2020;6: e19462. doi:10.2196/19462
9. Ferrer R. COVID-19 Pandemic: the greatest challenge in the history of critical care. *Med Intensiva Engl Ed.* 2020;44: 323–324. doi:10.1016/j.medine.2020.04.005
10. Iacobucci G. Covid-19: all non-urgent elective surgery is suspended for at least three months in England. *BMJ.* 2020; m1106. doi:10.1136/bmj.m1106
11. Lai AG, Pasa L, Banerjee A, Hall G, Denaxas S, Chang WH, et al. Estimated impact of the COVID-19 pandemic on cancer services and excess 1-year mortality in people with cancer and multimorbidity: near real-time data on cancer care, cancer deaths and a population-based cohort study. *BMJ Open.* 2020;10: e043828. doi:10.1136/bmjopen-2020-043828
12. Ferguson N, Laydon D, Nedjati Gilani G, Imai N, Ainslie K, Baguelin M, et al. Report 9: Impact of non-pharmaceutical interventions (NPIs) to reduce COVID19 mortality and healthcare demand. Imperial College London; 2020 Mar. doi:10.25561/77482
13. UK GOV. Government secures 5 million doses of Moderna vaccine. In: GOV.UK [Internet]. 16 Nov 2020 [cited 18 Nov 2020]. Available: <https://www.gov.uk/government/news/government-secures-5-million-doses-of-moderna-vaccine>
14. Zhou F, Yu T, Du R, Fan G, Liu Y, Liu Z, et al. Clinical course and risk factors for mortality of adult inpatients with COVID-19 in Wuhan, China: a retrospective cohort study. *Lancet.* 2020;395: 1054–1062. doi:10.1016/S0140-6736(20)30566-3
15. Xu X-W, Wu X-X, Jiang X-G, Xu K-J, Ying L-J, Ma C-L, et al. Clinical findings in a group of patients infected with the 2019 novel coronavirus (SARS-Cov-2) outside of Wuhan, China: retrospective case series. *BMJ.* 2020; m606. doi:10.1136/bmj.m606
16. Modesti PA, Reboldi G, Cappuccio FP, Agyemang C, Remuzzi G, Rapi S, et al. Panethnic Differences in Blood Pressure in Europe: A Systematic Review and Meta-Analysis. *PLOS ONE.* 2016;11: e0147601. doi:10.1371/journal.pone.0147601
17. Metlay JP, Waterer GW, Long AC, Anzueto A, Brozek J, Crothers K, et al. Diagnosis and Treatment of Adults with Community-acquired Pneumonia. An Official Clinical Practice Guideline of the American Thoracic Society and Infectious Diseases Society of America. *Am J Respir Crit Care Med.* 2019;200: e45–e67. doi:10.1164/rccm.201908-1581ST



375 18. National Health Commission of the People's Republic of China. Chinese Clinical Guidance for COVID-  
376 19 Pneumonia Diagnosis and Treatment (7th edition). [cited 13 Dec 2020]. Available:  
377 <http://kjfy.meetingchina.org/msite/news/show/cn/3337.html>

378 19. R Core Team. R: A Language and Environment for Statistical Computing. Vienna, Austria: R  
379 Foundation for Statistical Computing; 2019. Available: <http://www.R-project.org/>

380 20. Balduzzi S, Rücker G, Schwarzer G. How to perform a meta-analysis with R: a practical tutorial. Evid  
381 Based Ment Health. 2019;22: 153–160. doi:10.1136/ebmental-2019-300117

382 21. Cao J, Tu W-J, Cheng W, Yu L, Liu Y-K, Hu X, et al. Clinical Features and Short-term Outcomes of 102  
383 Patients with Corona Virus Disease 2019 in Wuhan, China. Clin Infect Dis Off Publ Infect Dis Soc Am. 2020.  
384 doi:10.1093/cid/ciaa243

385 22. Chen L, Yu J, He W, Chen L, Yuan G, Dong F, et al. Risk factors for death in 1859 subjects with  
386 COVID-19. Leukemia. 2020;34: 2173–2183. doi:10.1038/s41375-020-0911-0

387 23. Chen T, Wu D, Chen H, Yan W, Yang D, Chen G, et al. Clinical characteristics of 113 deceased patients  
388 with coronavirus disease 2019: retrospective study. BMJ. 2020;368: m1091. doi:10.1136/bmj.m1091

389 24. Chen J, Qi T, Liu L, Ling Y, Qian Z, Li T, et al. Clinical progression of patients with COVID-19 in  
390 Shanghai, China. J Infect. 2020;80: e1–e6. doi:10.1016/j.jinf.2020.03.004

391 25. Dai M, Liu D, Liu M, Zhou F, Li G, Chen Z, et al. Patients with cancer appear more vulnerable to  
392 SARS-CoV-2: A multicenter study during the COVID-19 outbreak. Cancer Discov. 2020;10: 783.  
393 doi:10.1158/2159-8290.CD-20-0422

394 26. Deng Y, Liu W, Liu K, Fang Y-Y, Shang J, Zhou L, et al. Clinical characteristics of fatal and recovered  
395 cases of coronavirus disease 2019 in Wuhan, China: a retrospective study. Chin Med J (Engl). 2020;133: 1261–  
396 1267. doi:10.1097/CM9.0000000000000824

397 27. Du RH, Liang LR, Yang CQ, Wang W, Cao TZ, Li M, et al. Predictors of mortality for patients with  
398 COVID-19 pneumonia caused by SARS-CoV-2: a prospective cohort study. Eur Respir J. 2020;55.  
399 doi:10.1183/13993003.00524-2020

400 28. Feng Y, Ling Y, Bai T, Xie Y, Huang J, Li J, et al. COVID-19 with Different Severities: A Multicenter  
401 Study of Clinical Features. Am J Respir Crit Care Med. 2020;201: 1380–1388. doi:10.1164/rccm.202002-  
402 0445OC

403 29. Guan WJ, Liang WH, Zhao Y, Liang HR, Chen ZS, Li YM, et al. Comorbidity and its impact on 1590  
404 patients with COVID-19 in China: a nationwide analysis. Eur Respir J. 2020;55. doi:10.1183/13993003.00547-  
405 2020

406 30. Huang S, Wang J, Liu F, Liu J, Cao G, Yang C, et al. COVID-19 patients with hypertension have more  
407 severe disease: a multicenter retrospective observational study. *Hypertens Res.* 2020. doi:10.1038/s41440-020-  
408 0485-2

409 31. Huang R, Zhu L, Xue L, Liu L, Yan X, Wang J, et al. Clinical findings of patients with coronavirus  
410 disease 2019 in Jiangsu province, China: A retrospective, multi-center study. *PLoS Negl Trop Dis.* 2020;14:  
411 e0008280. doi:10.1371/journal.pntd.0008280

412 32. Jin X, Lian JS, Hu JH, Gao J, Zheng L, Zhang YM, et al. Epidemiological, clinical and virological  
413 characteristics of 74 cases of coronavirus-infected disease 2019 (COVID-19) with gastrointestinal symptoms.  
414 *Gut.* 2020;69: 1002–1009. doi:10.1136/gutjnl-2020-320926

415 33. Li J, Huang DQ, Zou B, Yang H, Hui WZ, Rui F, et al. Epidemiology of COVID-19: A systematic  
416 review and meta-analysis of clinical characteristics, risk factors, and outcomes. *J Med Virol.* 2020;n/a.  
417 doi:https://doi.org/10.1002/jmv.26424

418 34. Li H, Tian S, Chen T, Cui Z, Shi N, Zhong X, et al. Newly diagnosed diabetes is associated with a higher  
419 risk of mortality than known diabetes in hospitalized patients with COVID-19. *Diabetes Obes Metab.* 2020.  
420 doi:10.1111/dom.14099

421 35. Li H, Xiang X, Ren H, Xu L, Zhao L, Chen X, et al. Serum Amyloid A is a biomarker of severe  
422 Coronavirus Disease and poor prognosis. *J Infect.* 2020;80: 646–655. doi:10.1016/j.jinf.2020.03.035

423 36. Liang W, Liang H, Ou L, Chen B, Chen A, Li C, et al. Development and Validation of a Clinical Risk  
424 Score to Predict the Occurrence of Critical Illness in Hospitalized Patients with COVID-19. *JAMA Intern Med.*  
425 2020. doi:10.1001/jamainternmed.2020.2033

426 37. Liu F, Li L, Xu M, Wu J, Luo D, Zhu Y, et al. Prognostic value of interleukin-6, C-reactive protein, and  
427 procalcitonin in patients with COVID-19. *J Clin Virol.* 2020;127: 104370. doi:10.1016/j.jcv.2020.104370

428 38. Liu F, Zhang Q, Huang C, Shi C, Wang L, Shi N, et al. CT quantification of pneumonia lesions in early  
429 days predicts progression to severe illness in a cohort of COVID-19 patients. *Theranostics.* 2020;10: 5613–  
430 5622. doi:10.7150/thno.45985

431 39. Pei G, Zhang Z, Peng J, Liu L, Zhang C, Yu C, et al. Renal Involvement and Early Prognosis in Patients  
432 with COVID-19 Pneumonia. *J Am Soc Nephrol.* 2020;31: 1157–1165. doi:10.1681/ASN.2020030276

433 40. Qin C, Zhou L, Hu Z, Yang S, Zhang S, Chen M, et al. Clinical Characteristics and Outcomes of  
434 COVID-19 Patients with a History of Stroke in Wuhan, China. *Stroke.* 2020; 2219–2223.  
435 doi:10.1161/STROKEAHA.120.030365

436 41. Ren H, Yang Y, Wang F, Yan Y, Shi X, Dong K, et al. Association of the insulin resistance marker TyG  
437 index with the severity and mortality of COVID-19. *Cardiovasc Diabetol.* 2020;19: 58. doi:10.1186/s12933-  
438 020-01035-2

42. Ruan Q, Yang K, Wang W, Jiang L, Song J. Clinical predictors of mortality due to COVID-19 based on an analysis of data of 150 patients from Wuhan, China. *Intensive Care Med.* 2020;46: 846–848. doi:10.1007/s00134-020-05991-x
43. Shi Q, Zhang X, Jiang F, Hu N, Bimu C, Feng J, et al. Clinical Characteristics and Risk Factors for Mortality of COVID-19 Patients With Diabetes in Wuhan, China: A Two-Center, Retrospective Study. *Diabetes Care.* 2020;43: 1382–1391. doi:10.2337/dc20-0598
44. Shi Y, Yu X, Zhao H, Wang H, Zhao R, Sheng J. Host susceptibility to severe COVID-19 and establishment of a host risk score: findings of 487 cases outside Wuhan. *Crit Care.* 2020;24: 108. doi:10.1186/s13054-020-2833-7
45. Wang D, Yin Y, Hu C, Liu X, Zhang X, Zhou S, et al. Clinical course and outcome of 107 patients infected with the novel coronavirus, SARS-CoV-2, discharged from two hospitals in Wuhan, China. *Crit Care.* 2020;24: 188. doi:10.1186/s13054-020-02895-6
46. Wang D, Hu B, Hu C, Zhu F, Liu X, Zhang J, et al. Clinical Characteristics of 138 Hospitalized Patients with 2019 Novel Coronavirus-Infected Pneumonia in Wuhan, China. *JAMA - J Am Med Assoc.* 2020;323: 1061–1069. doi:10.1001/jama.2020.1585
47. Wang R, Pan M, Zhang X, Han M, Fan X, Zhao F, et al. Epidemiological and clinical features of 125 Hospitalized Patients with COVID-19 in Fuyang, Anhui, China. *Int J Infect Dis.* 2020;95: 421–428. doi:10.1016/j.ijid.2020.03.070
48. Wang L, He W, Yu X, Hu D, Bao M, Liu H, et al. Coronavirus disease 2019 in elderly patients: Characteristics and prognostic factors based on 4-week follow-up. *J Infect.* 2020;80: 639–645. doi:10.1016/j.jinf.2020.03.019
49. Wang Y, Lu X, Li Y, Chen H, Chen T, Su N, et al. Clinical Course and Outcomes of 344 Intensive Care Patients with COVID-19. *Am J Respir Crit Care Med.* 2020;201: 1430–1434. doi:10.1164/rccm.202003-0736LE
50. Wu F, Zhou Y, Wang Z, Xie M, Shi Z, Tang Z, et al. Clinical characteristics of COVID-19 infection in chronic obstructive pulmonary disease: A multicenter, retrospective, observational study. *J Thorac Dis.* 2020;12: 1811–1823. doi:10.21037/jtd-20-1914
51. Xie J, Covassin N, Fan Z, Singh P, Gao W, Li G, et al. Association Between Hypoxemia and Mortality in Patients With COVID-19. *Mayo Clin Proc.* 2020;95: 1138–1147. doi:10.1016/j.mayocp.2020.04.006
52. Yan Y, Yang Y, Wang F, Ren H, Zhang S, Shi X, et al. Clinical characteristics and outcomes of patients with severe covid-19 with diabetes. *BMJ Open Diabetes Res Care.* 2020;8. doi:10.1136/bmjdr-2020-001343
53. Yang L, Liu J, Zhang R, Li M, Li Z, Zhou X, et al. Epidemiological and clinical features of 200 hospitalized patients with corona virus disease 2019 outside Wuhan, China: A descriptive study. *J Clin Virol.* 2020;129. doi:10.1016/j.jcv.2020.104475

473 54. Yao Q, Wang P, Wang X, Qie G, Meng M, Tong X, et al. A retrospective study of risk factors for severe  
474 acute respiratory syndrome coronavirus 2 infections in hospitalized adult patients. *Pol Arch Intern Med*.  
475 2020;130: 390–399. doi:10.20452/pamw.15312

476 55. Ye C, Zhang S, Zhang X, Cai H, Gu J, Lian J, et al. Impact of comorbidities on patients with COVID-19:  
477 A large retrospective study in Zhejiang, China. *J Med Virol*. 2020. doi:10.1002/jmv.26183

478 56. Yu Q, Wang Y, Huang S, Liu S, Zhou Z, Zhang S, et al. Multicenter cohort study demonstrates more  
479 consolidation in upper lungs on initial CT increases the risk of adverse clinical outcome in COVID-19 patients.  
480 *Theranostics*. 2020;10: 5641–5648. doi:10.7150/thno.46465

481 57. Zhang G, Hu C, Luo L, Fang F, Chen Y, Li J, et al. Clinical features and short-term outcomes of 221  
482 patients with COVID-19 in Wuhan, China. *J Clin Virol*. 2020;127: 104364. doi:10.1016/j.jcv.2020.104364

483 58. Zhang J, Wang X, Jia X, Li J, Hu K, Chen G, et al. Risk factors for disease severity, unimprovement, and  
484 mortality in COVID-19 patients in Wuhan, China. *Clin Microbiol Infect*. 2020;26: 767–772.  
485 doi:10.1016/j.cmi.2020.04.012

486 59. Zhang J, Yu M, Tong S, Liu LY, Tang LV. Predictive factors for disease progression in hospitalized  
487 patients with coronavirus disease 2019 in Wuhan, China. *J Clin Virol*. 2020;127: 104392.  
488 doi:10.1016/j.jcv.2020.104392

489 60. Zhang X, Cai H, Hu J, Lian J, Gu J, Zhang S, et al. Epidemiological, clinical characteristics of cases of  
490 SARS-CoV-2 infection with abnormal imaging findings. *Int J Infect Dis*. 2020;94: 81–87.  
491 doi:10.1016/j.ijid.2020.03.040

492 61. Zheng Z, Peng F, Xu B, Zhao J, Liu H, Peng J, et al. Risk factors of critical & mortal COVID-19 cases:  
493 A systematic literature review and meta-analysis. *J Infect*. 2020;81: e16–e25. doi:10.1016/j.jinf.2020.04.021

494 62. Zhou Y, He Y, Yang H, Yu H, Wang T, Chen Z, et al. Development and validation a nomogram for  
495 predicting the risk of severe COVID-19: A multi-center study in Sichuan, China. *PLoS One*. 2020;15:  
496 e0233328. doi:10.1371/journal.pone.0233328

497 63. Argenziano MG, Bruce SL, Slater CL, Tiao JR, Baldwin MR, Barr RG, et al. Characterization and  
498 clinical course of 1000 patients with coronavirus disease 2019 in New York: retrospective case series. *BMJ*.  
499 2020;369: m1996. doi:10.1136/bmj.m1996

500 64. Cummings MJ, Baldwin MR, Abrams D, Jacobson SD, Meyer BJ, Balough EM, et al. Epidemiology,  
501 clinical course, and outcomes of critically ill adults with COVID-19 in New York City: a prospective cohort  
502 study. *Lancet*. 2020;395: 1763–1770. doi:10.1016/S0140-6736(20)31189-2

503 65. D'Silva KM, Serling-Boyd N, Wallwork R, Hsu T, Fu X, Gravallese EM, et al. Clinical characteristics  
504 and outcomes of patients with coronavirus disease 2019 (COVID-19) and rheumatic disease: A comparative  
505 cohort study from a US “hot spot.” *Ann Rheum Dis*. 2020. doi:10.1136/annrheumdis-2020-217888

506 66. Gupta S, Hayek SS, Wang W, Chan L, Mathews KS, Melamed ML, et al. Factors Associated With Death  
507 in Critically Ill Patients With Coronavirus Disease 2019 in the US. *JAMA Intern Med.* 2020.  
508 doi:10.1001/jamainternmed.2020.3596

509 67. Hajifathalian K, Kumar S, Newberry C, Shah S, Fortune B, Krisko T, et al. Obesity is associated with  
510 worse outcomes in COVID-19: Analysis of Early Data From New York City. *Obesity.* 2020;n/a.  
511 doi:10.1002/oby.22923

512 68. Imam Z, Odish F, Gill I, O'Connor D, Armstrong J, Vanood A, et al. Older age and comorbidity are  
513 independent mortality predictors in a large cohort of 1305 COVID-19 patients in Michigan, United States. *J*  
514 *Intern Med.* 2020;n/a. doi:10.1111/joim.13119

515 69. Kalligeros M, Shehadeh F, Mylona EK, Benitez G, Beckwith CG, Chan PA, et al. Association of Obesity  
516 with Disease Severity Among Patients with Coronavirus Disease 2019. *Obesity.* 2020;28: 1200–1204.  
517 doi:10.1002/oby.22859

518 70. Kim L, Garg S, O'Halloran A, Whitaker M, Pham H, Anderson EJ, et al. Risk Factors for Intensive Care  
519 Unit Admission and In-hospital Mortality among Hospitalized Adults Identified through the U.S. Coronavirus  
520 Disease 2019 (COVID-19)-Associated Hospitalization Surveillance Network (COVID-NET). *Clin Infect Dis.*  
521 2020. doi:10.1093/cid/ciaa1012

522 71. Latz CA, DeCarlo C, Boitano L, Png CYM, Patell R, Conrad MF, et al. Blood type and outcomes in  
523 patients with COVID-19. *Ann Hematol.* 2020. doi:10.1007/s00277-020-04169-1

524 72. Okoh AK, Sossou C, Dangayach NS, Meledathu S, Phillips O, Raczek C, et al. Coronavirus disease 19 in  
525 minority populations of Newark, New Jersey. *Int J Equity Health.* 2020;19: 93. doi:10.1186/s12939-020-01208-  
526 1

527 73. Palaodimos L, Kokkinidis DG, Li W, Karamanis D, Ognibene J, Arora S, et al. Severe obesity is  
528 associated with higher in-hospital mortality in a cohort of patients with COVID-19 in the Bronx, New York.  
529 *Metabolism.* 2020;108. doi:10.1016/j.metabol.2020.154262

530 74. Petrilli CM, Jones SA, Yang J, Rajagopalan H, O'Donnell L, Chernyak Y, et al. Factors associated with  
531 hospital admission and critical illness among 5279 people with coronavirus disease 2019 in New York City:  
532 prospective cohort study. *BMJ.* 2020;369: m1966. doi:10.1136/bmj.m1966

533 75. Price-Haywood EG, Burton J, Fort D, Seoane L. Hospitalization and Mortality among Black Patients and  
534 White Patients with Covid-19. *N Engl J Med.* 2020;382: 2534–2543. doi:10.1056/NEJMsa2011686

535 76. Ramlall V, Thangaraj PM, Meydan C, Foox J, Butler D, Kim J, et al. Immune complement and  
536 coagulation dysfunction in adverse outcomes of SARS-CoV-2 infection. *Nat Med.* 2020. doi:10.1038/s41591-  
537 020-1021-2

538 77. Suleyman G, Fadel RA, Malette KM, Hammond C, Abdulla H, Entz A, et al. Clinical Characteristics and  
539 Morbidity Associated With Coronavirus Disease 2019 in a Series of Patients in Metropolitan Detroit. *JAMA*  
540 *Netw Open*. 2020;3: e2012270. doi:10.1001/jamanetworkopen.2020.12270

541 78. Giacomelli A, Ridolfo AL, Milazzo L, Oreni L, Bernacchia D, Siano M, et al. 30-day mortality in  
542 patients hospitalized with COVID-19 during the first wave of the Italian epidemic: A prospective cohort study.  
543 *Pharmacol Res*. 2020;158. doi:10.1016/j.phrs.2020.104931

544 79. Grasselli G, Zangrillo A, Zanella A, Antonelli M, Cabrini L, Castelli A, et al. Baseline Characteristics  
545 and Outcomes of 1591 Patients Infected with SARS-CoV-2 Admitted to ICUs of the Lombardy Region, Italy.  
546 *JAMA - J Am Med Assoc*. 2020;323: 1574–1581. doi:10.1001/jama.2020.5394

547 80. Masetti C, Generali E, Colapietro F, Voza A, Cecconi M, Messina A, et al. High mortality in COVID-19  
548 patients with mild respiratory disease. *Eur J Clin Invest*. 2020. doi:10.1111/eci.13314

549 81. Ellinghaus D, Degenhardt F, Bujanda L, Buti M, Albillos A, Invernizzi P, et al. Genomewide  
550 Association Study of Severe Covid-19 with Respiratory Failure. *N Engl J Med*. 2020.  
551 doi:10.1056/NEJMoa2020283

552 82. Docherty AB, Harrison EM, Green CA, Hardwick HE, Pius R, Norman L, et al. Features of 20 133 UK  
553 patients in hospital with covid-19 using the ISARIC WHO Clinical Characterisation Protocol: prospective  
554 observational cohort study. *BMJ*. 2020;369: m1985. doi:10.1136/bmj.m1985

555 83. Lassale C, Gaye B, Hamer M, Gale CR, Batty GD. Ethnic disparities in hospitalisation for COVID-19 in  
556 England: The role of socioeconomic factors, mental health, and inflammatory and pro-inflammatory factors in a  
557 community-based cohort study. *Brain Behav Immun*. 2020;88: 44–49. doi:10.1016/j.bbi.2020.05.074

558 84. Williamson EJ, Walker AJ, Bhaskaran K, Bacon S, Bates C, Morton CE, et al. Factors associated with  
559 COVID-19-related death using OpenSAFELY. *Nature*. 2020. doi:10.1038/s41586-020-2521-4

560 85. Bello-Chavolla OY, Bahena-López JP, Antonio-Villa NE, Vargas-Vázquez A, González-Díaz A,  
561 Márquez-Salinas A, et al. Predicting Mortality Due to SARS-CoV-2: A Mechanistic Score Relating Obesity and  
562 Diabetes to COVID-19 Outcomes in Mexico. *J Clin Endocrinol Metab*. 2020;105. doi:10.1210/clinem/dgaa346

563 86. Kammar-García A, Vidal-Mayo JJ, Vera-Zertuche JM, Lazcano-Hernández M, Vera-López O, Segura-  
564 Badilla O, et al. IMPACT OF COMORBIDITIES IN MEXICAN SARS-COV-2-POSITIVE PATIENTS: A  
565 RETROSPECTIVE ANALYSIS IN A NATIONAL COHORT. *Rev Investig Clin Organo Hosp Enfermedades*  
566 *Nutr*. 2020;72: 151–158. doi:10.24875/RIC.20000207

567 87. Hou W, Zhang W, Jin R, Liang L, Xu B, Hu Z. Risk factors for disease progression in hospitalized  
568 patients with COVID-19: a retrospective cohort study. *Infect Lond*. 2020;52: 498–505.  
569 doi:10.1080/23744235.2020.1759817

570 88. Lee Y, Min P, Lee S, Kim SW. Prevalence and Duration of Acute Loss of Smell or Taste in COVID-19  
571 Patients. *J Korean Med Sci*. 2020;35: e174. doi:10.3346/jkms.2020.35.e174

572 89. Göker H, Aladağ-Karakulak E, Demiroğlu H, Ayaz CM, Büyükaşık Y, İnkaya AC, et al. The effects of  
573 blood group types on the risk of COVID-19 infection and its clinical outcome. *Turk J Med Sci.* 2020;50: 679–  
574 683. doi:10.3906/sag-2005-395

575 90. Baqui P, Bica I, Marra V, Ercole A, van der Schaar M. Ethnic and regional variations in hospital  
576 mortality from COVID-19 in Brazil: a cross-sectional observational study. *Lancet Glob Health.* 2020;8: e1018–  
577 e1026. doi:10.1016/S2214-109X(20)30285-0

578 91. Israelsen SB, Kristiansen KT, Hindsberger B, Ulrik CS, Andersen O, Jensen M, et al. Characteristics of  
579 patients with COVID-19 pneumonia at Hvidovre Hospital, March-April 2020. *Dan Med J.* 2020;67.

580 92. Simonnet A, Chetboun M, Poissy J, Raverdy V, Noulette J, Duhamel A, et al. High Prevalence of  
581 Obesity in Severe Acute Respiratory Syndrome Coronavirus-2 (SARS-CoV-2) Requiring Invasive Mechanical  
582 Ventilation. *Obesity.* 2020;28: 1195–1199. doi:10.1002/oby.22831

583 93. Itelman E, Wasserstrum Y, Segev A, Avaky C, Negru L, Cohen D, et al. Clinical Characterization of 162  
584 COVID-19 patients in Israel: Preliminary Report from a Large Tertiary Center. *Isr Med Assoc J.* 2020;22: 271–  
585 274.

586 94. Shahriarirad R, Khodamoradi Z, Erfani A, Hosseinpour H, Ranjbar K, Emami Y, et al. Epidemiological  
587 and clinical features of 2019 novel coronavirus diseases (COVID-19) in the South of Iran. *BMC Infect Dis.*  
588 2020;20. doi:10.1186/s12879-020-05128-x

589 95. Nowak B, Szymański P, Pańkowski I, Szarowska A, Życińska K, Rogowski W, et al. Clinical  
590 characteristics and short-term outcomes of patients with coronavirus disease 2019: a retrospective single-center  
591 experience of a designated hospital in Poland. *Pol Arch Intern Med.* 2020;130: 407–411.  
592 doi:10.20452/pamw.15361

593 96. Li Q, Cao Y, Chen L, Wu D, Yu J, Wang H, et al. Hematological features of persons with COVID-19.  
594 *Leukemia.* 2020;34: 2163–2172. doi:10.1038/s41375-020-0910-1

595 97. Zheng F, Tang W, Li H, Huang YX, Xie YL, Zhou ZG. Clinical characteristics of 161 cases of corona  
596 virus disease 2019 (COVID-19) in Changsha. *Eur Rev Med Pharmacol Sci.* 2020;24: 3404–3410.  
597 doi:10.26355/eurrev\_202003\_20711

598 98. Gold MS, Sehayek D, Gabrielli S, Zhang X, McCusker C, Ben-Shoshan M. COVID-19 and  
599 comorbidities: a systematic review and meta-analysis. *Postgrad Med.* 2020;0: 1–7.  
600 doi:10.1080/00325481.2020.1786964

601 99. Wolff D, Nee S, Hickey NS, Marschollek M. Risk factors for Covid-19 severity and fatality: a structured  
602 literature review. *Infection.* 2020; 1–14. doi:10.1007/s15010-020-01509-1

603 100. Wynants L, Calster BV, Collins GS, Riley RD, Heinze G, Schuit E, et al. Prediction models for  
604 diagnosis and prognosis of covid-19: systematic review and critical appraisal. *BMJ.* 2020;369.  
605 doi:10.1136/bmj.m1328



101. Al Hassan H, Cocks E, Jesani L, Lewis S, Szakmany T. Clinical Risk Prediction Scores in Coronavirus Disease 2019: Beware of Low Validity and Clinical Utility. *Crit Care Explor.* 2020;2. doi:10.1097/CCE.0000000000000253
102. Moons KGM, Altman DG, Reitsma JB, Ioannidis JPA, Macaskill P, Steyerberg EW, et al. Transparent Reporting of a multivariable prediction model for Individual Prognosis or Diagnosis (TRIPOD): explanation and elaboration. *Ann Intern Med.* 2015;162: W1-73. doi:10.7326/M14-0698
103. Mahase E. Covid-19: What do we know about “long covid”? *BMJ.* 2020;370. doi:10.1136/bmj.m2815
104. Kelada M, Anto A, Dave K, Saleh SN. The Role of Sex in the Risk of Mortality From COVID-19 Amongst Adult Patients: A Systematic Review. *Cureus.* 2020;12. doi:10.7759/cureus.10114
105. Mahase E. Covid-19: Why are age and obesity risk factors for serious disease? *BMJ.* 2020;371. doi:10.1136/bmj.m4130
106. Farsalinos K, Barbouni A, Niaura R. Systematic review of the prevalence of current smoking among hospitalized COVID-19 patients in China: could nicotine be a therapeutic option? *Intern Emerg Med.* 2020; 1–8. doi:10.1007/s11739-020-02355-7
107. Petersen I, Phillips A. Three Quarters of People with SARS-CoV-2 Infection are Asymptomatic: Analysis of English Household Survey Data. *Clin Epidemiol.* 2020;Volume 12: 1039–1043. doi:10.2147/CLEP.S276825
108. Liao D, Zhou F, Luo L, Xu M, Wang H, Xia J, et al. Haematological characteristics and risk factors in the classification and prognosis evaluation of COVID-19: a retrospective cohort study. *Lancet Haematol.* 2020;7: e671–e678. doi:10.1016/S2352-3026(20)30217-9
109. Public Health England. Beyond the Data: Understanding the Impact of COVID-19 on BAME Communities. 2020 Jun.
110. UK GOV. Quarterly report on progress to address COVID-19 health inequalities. Race Disparity Unit, Cabinet Office; 2020 Oct. Available: <https://www.gov.uk/government/publications/quarterly-report-on-progress-to-address-covid-19-health-inequalities>
111. WHO. Global COVID-19 Clinical Platform: Rapid core case report form (CRF). World Health Organization; 2020 Aug. Report No.: WHO/2019-nCoV/Clinical\_CRF/2020.4. Available: [https://www.who.int/publications-detail-redirect/WHO-2019-nCoV-Clinical\\_CRF-2020.4](https://www.who.int/publications-detail-redirect/WHO-2019-nCoV-Clinical_CRF-2020.4)
112. Clift AK, Coupland CAC, Keogh RH, Diaz-Ordaz K, Williamson E, Harrison EM, et al. Living risk prediction algorithm (QCOVID) for risk of hospital admission and mortality from coronavirus 19 in adults: national derivation and validation cohort study. *BMJ.* 2020;371. doi:10.1136/bmj.m3731



- 637 113. Knight SR, Ho A, Pius R, Buchan I, Carson G, Drake TM, et al. Risk stratification of patients admitted  
638 to hospital with covid-19 using the ISARIC WHO Clinical Characterisation Protocol: development and  
639 validation of the 4C Mortality Score. BMJ. 2020;370. doi:10.1136/bmj.m3339
- 640 114. CO-CIN. COVID-19 - Time from symptom onset until death in UK hospitalised patients, 7 October  
641 2020. Scientific Advisory Group for Emergencies; 2020 Oct. Available:  
642 [https://www.gov.uk/government/publications/co-cin-covid-19-time-from-symptom-onset-until-death-in-uk-](https://www.gov.uk/government/publications/co-cin-covid-19-time-from-symptom-onset-until-death-in-uk-hospitalised-patients-7-october-2020)  
643 [hospitalised-patients-7-october-2020](https://www.gov.uk/government/publications/co-cin-covid-19-time-from-symptom-onset-until-death-in-uk-hospitalised-patients-7-october-2020)
- 644 115. Thornton J. The “virtual wards” supporting patients with covid-19 in the community. BMJ. 2020;369.  
645 doi:10.1136/bmj.m2119

## Supporting information

**S1 Fig.** Forest plot for the association of patient characteristics between age and sex, and mortality in COVID-19 using a random-effects model.

**S2 Fig.** Forest plot for the association of comorbidities, between diabetes, hypertension and active cancer, and mortality in COVID-19 using a random-effects model.

**S3 Fig.** Reported risk estimates for male sex. Size of the circle indicates sample size represented.

**S4 Fig.** Reported risk estimates for any diabetes. Size of the circle indicates sample size represented.

**S5 Fig.** Reported risk estimates for any hypertension. Size of the circle indicates sample size represented.

|                                                                                                                                                                                                                                                                                                                                                                                                                                                                                                                                                                                                                                                                                                                                                                                                                                                                                                                                                                                                                                                                       |
|-----------------------------------------------------------------------------------------------------------------------------------------------------------------------------------------------------------------------------------------------------------------------------------------------------------------------------------------------------------------------------------------------------------------------------------------------------------------------------------------------------------------------------------------------------------------------------------------------------------------------------------------------------------------------------------------------------------------------------------------------------------------------------------------------------------------------------------------------------------------------------------------------------------------------------------------------------------------------------------------------------------------------------------------------------------------------|
| <b>S1 Table. Search terms</b>                                                                                                                                                                                                                                                                                                                                                                                                                                                                                                                                                                                                                                                                                                                                                                                                                                                                                                                                                                                                                                         |
| <b>Search strategy (PICO)</b>                                                                                                                                                                                                                                                                                                                                                                                                                                                                                                                                                                                                                                                                                                                                                                                                                                                                                                                                                                                                                                         |
| 1. COVID-19 [Supplementary Concept]<br>2. (ventilator OR ICU OR intensive care OR MODS OR ARDS OR severity OR prognosis OR hospitalis* OR hospitaliz* OR intubation OR ventilation OR admission* OR admitted OR "critical care" OR "critical cases" OR severe) [Title/Abstract]<br>3. (clinical OR symptom* OR characteristic* OR comorbidit* OR "co morbidit*" OR "risk factors" OR predict*) [Title/Abstract]<br>4. (pediatric* OR paediatric* OR child*) [Title/Abstract]<br>5. ("2020/01/01"[Date - Publication] : "3000"[Date - Publication])<br>1 AND 2 AND 3 AND 5 NOT 4                                                                                                                                                                                                                                                                                                                                                                                                                                                                                       |
| <b>Search terms for PubMed</b>                                                                                                                                                                                                                                                                                                                                                                                                                                                                                                                                                                                                                                                                                                                                                                                                                                                                                                                                                                                                                                        |
| (((((COVID-19[Supplementary Concept]) AND ((ventilator[Title/Abstract] OR ICU[Title/Abstract] OR intensive care[Title/Abstract] OR mortality[Title/Abstract] OR prognosis[Title/Abstract] "MODS"[Title/Abstract] OR ARDS[Title/Abstract] OR severity[Title/Abstract] OR prognosis[Title/Abstract] OR hospitalis*[Title/Abstract] OR hospitaliz*[Title/Abstract] OR "respiratory failure"[Title/Abstract] OR intubation[Title/Abstract] OR ventilation[Title/Abstract] OR admission*[Title/Abstract] OR admitted[Title/Abstract] OR "critical care"[Title/Abstract] OR "critical cases"[Title/Abstract] OR severe)[Title/Abstract])) AND ((clinical[Title/Abstract] OR symptom*[Title/Abstract] OR characteristic*[Title/Abstract] OR comorbidit*[Title/Abstract] OR "co morbidit*" [Title/Abstract] OR risk[Title/Abstract] OR predict*) [Title/Abstract])) NOT ((pediatric*[Title/Abstract] OR paediatric*[Title/Abstract] OR child*) [Title/Abstract])) AND (("2020/01/01"[Date - Publication] : "3000"[Date - Publication])) Filters: English Sort by: Most Recent |
| <b>Search terms for Scopus</b>                                                                                                                                                                                                                                                                                                                                                                                                                                                                                                                                                                                                                                                                                                                                                                                                                                                                                                                                                                                                                                        |
| (TITLE-ABS-KEY ( ncov* OR coronavirus OR "SARS-CoV-2" OR covid-19 OR covid ) AND TITLE-ABS-KEY ( ventilator OR icu OR intensive AND care OR mortality OR prognosis "MODS" OR ards OR severity OR prognosis OR hospitalis* OR hospitaliz* OR "respiratory failure" OR intubation OR ventilation OR admission* OR admitted OR "critical care" OR "critical cases" ) AND TITLE-ABS-KEY ( clinical OR symptom* OR characteristic* OR comorbidit* OR "co morbidit*" OR risk OR predict* ) AND NOT TITLE-ABS-KEY ( pediatric* OR paediatric* OR child* ) ) AND DOCTYPE ( ar OR re ) AND PUBYEAR > 2019                                                                                                                                                                                                                                                                                                                                                                                                                                                                      |

**S1 Table.** Systematic literature review search terms and strategy.

END OF MANUSCRIPT

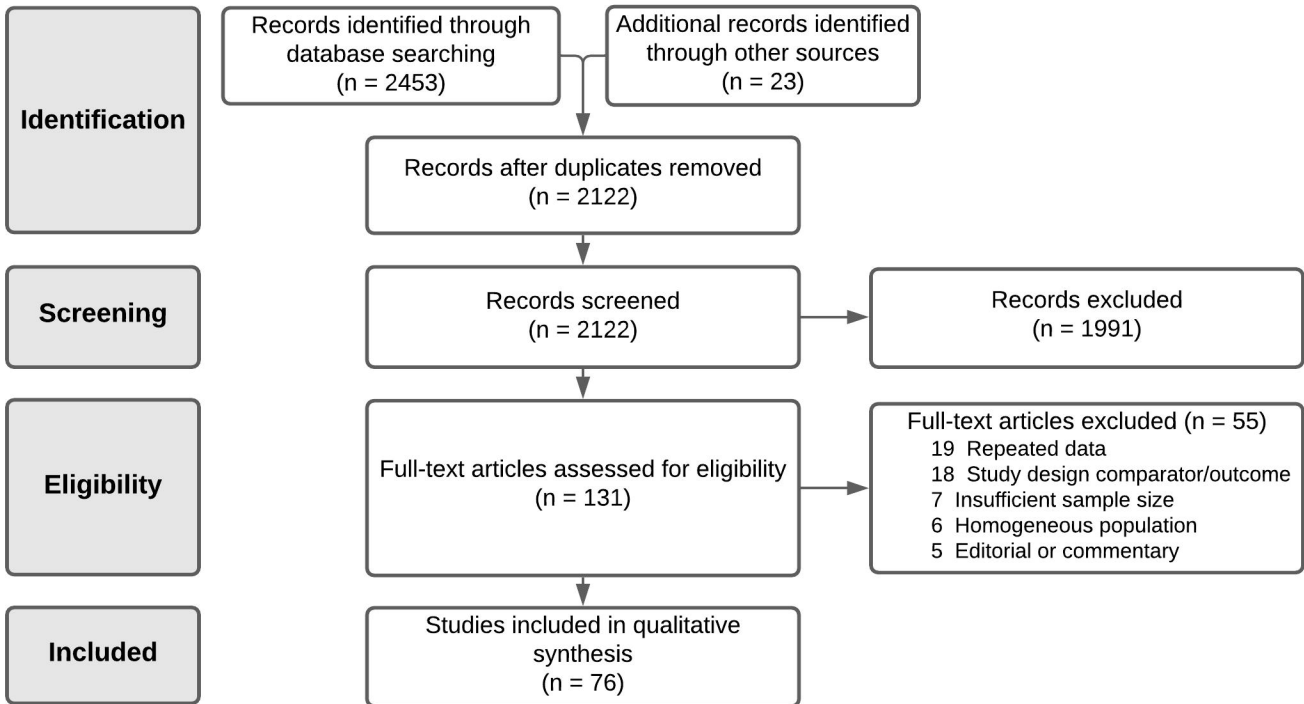

## Age >75 years old

| Source                                                        | OR (95% CI)         |
|---------------------------------------------------------------|---------------------|
| Chen2020                                                      | 6.67 [1.00; 44.49]  |
| Shi2020                                                       | 6.67 [2.62; 16.98]  |
| Hou2020                                                       | 6.88 [0.38; 124.56] |
| Petrilli2020                                                  | 2.32 [1.57; 3.43]   |
| Kalligeros2020                                                | 2.62 [1.00; 6.86]   |
| Palaiodimos2020                                               | 2.62 [1.00; 6.86]   |
| Simonnet2020                                                  | 1.00 [0.37; 2.70]   |
| Huang2020                                                     | 4.75 [2.62; 8.61]   |
| Lassale2020                                                   | 1.91 [1.38; 2.64]   |
| Price-Haywood2020                                             | 2.06 [1.88; 2.26]   |
| Total (fixed effect)                                          | 2.12 [1.95; 2.30]   |
| Total (random effects)                                        | 2.65 [1.81; 3.90]   |
| Heterogeneity: $\chi^2_3 = 18.42$ ( $P = .03$ ), $I^2 = 51\%$ |                     |

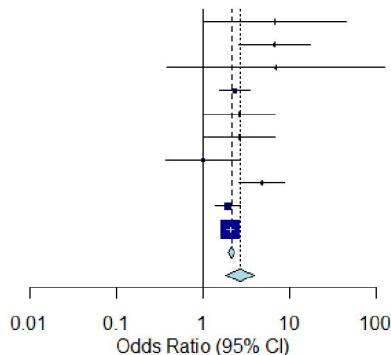

## Male

| Source                                                            | OR (95% CI)          |
|-------------------------------------------------------------------|----------------------|
| Chen2020                                                          | 3.38 [0.77; 14.84]   |
| Shi2020                                                           | 3.68 [1.75; 7.74]    |
| Zhang2020                                                         | 24.80 [1.80; 341.67] |
| Petrilli2020                                                      | 1.06 [0.85; 1.32]    |
| Suleyman2020                                                      | 2.00 [1.30; 3.08]    |
| Kalligeros2020                                                    | 2.40 [0.87; 6.62]    |
| Palaiodimos2020                                                   | 2.96 [1.35; 6.49]    |
| Simonnet2020                                                      | 2.83 [1.02; 7.85]    |
| Huang2020                                                         | 1.91 [1.17; 3.12]    |
| Lassale2020                                                       | 1.15 [0.93; 1.42]    |
| Price-Haywood2020                                                 | 1.79 [1.54; 2.08]    |
| Total (fixed effect)                                              | 1.53 [1.38; 1.69]    |
| Total (random effects)                                            | 2.05 [1.39; 3.04]    |
| Heterogeneity: $\chi^2_{10} = 39.67$ ( $P < .001$ ), $I^2 = 75\%$ |                      |

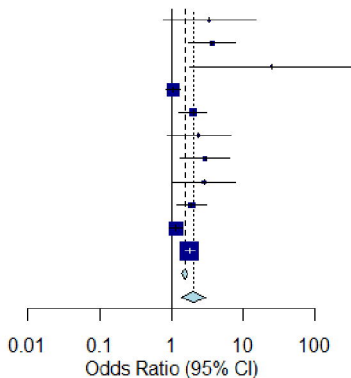

## Severe Obesity

| Source                                                       | OR (95% CI)        |
|--------------------------------------------------------------|--------------------|
| Petrilli2020                                                 | 1.71 [1.10; 2.66]  |
| Suleyman2020                                                 | 2.00 [1.40; 2.86]  |
| Kalligeros2020                                               | 5.39 [1.13; 25.71] |
| Simonnet2020                                                 | 7.36 [1.63; 33.23] |
| Total (fixed effect)                                         | 2.03 [1.55; 2.65]  |
| Total (random effects)                                       | 2.57 [1.31; 5.05]  |
| Heterogeneity: $\chi^2_3 = 4.89$ ( $P = .18$ ), $I^2 = 39\%$ |                    |

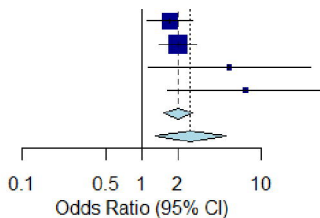

## Diabetes

| Source                                                        | OR (95% CI)          |
|---------------------------------------------------------------|----------------------|
| Huang2020                                                     | 4.33 [1.06; 17.69]   |
| Hou2020                                                       | 64.13 [4.59; 895.96] |
| Petrilli2020                                                  | 1.23 [0.99; 1.53]    |
| Suleyman2020                                                  | 1.30 [0.80; 2.11]    |
| Kalligeros2020                                                | 1.91 [0.71; 5.14]    |
| Palaiodimos2020                                               | 1.40 [0.66; 2.97]    |
| Simonnet2020                                                  | 1.60 [0.44; 5.82]    |
| Kammar-Garc a2020                                             | 1.40 [1.20; 1.63]    |
| Total (fixed effect)                                          | 1.37 [1.22; 1.54]    |
| Total (random effects)                                        | 1.99 [0.92; 4.29]    |
| Heterogeneity: $\chi^2_7 = 12.30$ ( $P = .09$ ), $I^2 = 43\%$ |                      |

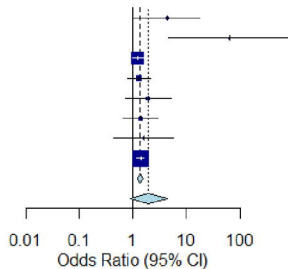

## Active cancer

| Source                                                      | OR (95% CI)       |
|-------------------------------------------------------------|-------------------|
| Petrilli2020                                                | 1.30 [0.95; 1.78] |
| Suleyman2020                                                | 1.90 [1.00; 3.61] |
| Dai2020                                                     | 1.99 [0.53; 7.47] |
| Total (fixed effect)                                        | 1.42 [1.08; 1.87] |
| Total (random effects)                                      | 1.46 [1.04; 2.04] |
| Heterogeneity: $\chi^2_2 = 1.35$ ( $P = .51$ ), $I^2 = 0\%$ |                   |

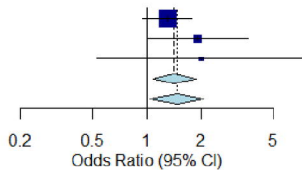

## Hypertension

| Source                                                         | OR (95% CI)        |
|----------------------------------------------------------------|--------------------|
| Shi2020                                                        | 2.71 [1.32; 5.56]  |
| Hou2020                                                        | 2.98 [0.77; 11.53] |
| Petrilli2020                                                   | 0.96 [0.75; 1.23]  |
| Suleyman2020                                                   | 1.00 [0.50; 2.00]  |
| Kalligeros2020                                                 | 0.79 [0.27; 2.31]  |
| Simonnet2020                                                   | 2.29 [0.89; 5.89]  |
| Kammar-Garc a2020                                              | 1.40 [1.20; 1.63]  |
| Huang2020                                                      | 1.56 [0.93; 2.62]  |
| Lassale2020                                                    | 1.02 [0.87; 1.20]  |
| Total (fixed effect)                                           | 1.19 [1.08; 1.31]  |
| Total (random effects)                                         | 1.33 [0.99; 1.80]  |
| Heterogeneity: $\chi^2_8 = 21.27$ ( $P = .006$ ), $I^2 = 62\%$ |                    |

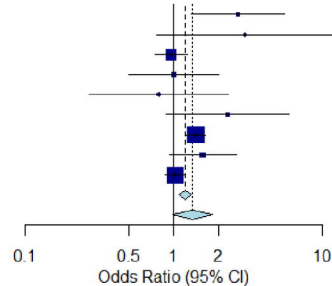

## Chronic Kidney Disease

| Source                                                         | OR (95% CI)       |
|----------------------------------------------------------------|-------------------|
| Petrilli2020                                                   | 0.73 [0.55; 0.97] |
| Suleyman2020                                                   | 2.00 [1.30; 3.08] |
| Kammar-Garc a2020                                              | 1.50 [0.90; 2.50] |
| Total (fixed effect)                                           | 1.06 [0.86; 1.32] |
| Total (random effects)                                         | 1.27 [0.70; 2.29] |
| Heterogeneity: $\chi^2_2 = 16.78$ ( $P < .001$ ), $I^2 = 88\%$ |                   |

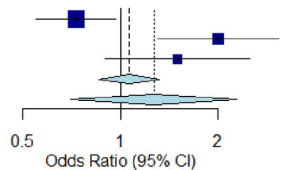

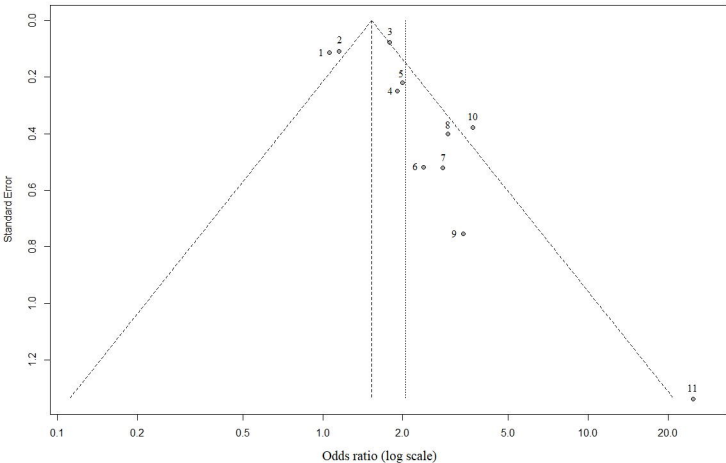

Source: http://medrxiv.org/cgi/reprint/2020.12.21.20248610v1
