# Supplementary material for: Population risk factors for severe disease and mortality in COVID-19: A global systematic review and meta-analysis
Source: bioRxiv or medRxiv preprint supplement (doi:10.1101/2020.12.21.20248610), 2020-12-22

## Diabetes

| Source                                                      | OR (95% CI)       |
|-------------------------------------------------------------|-------------------|
| Palaiodimos2020                                             | 1.16 [0.55; 2.45] |
| Gupta2020                                                   | 1.14 [0.91; 1.43] |
| Total (fixed effect)                                        | 1.14 [0.92; 1.42] |
| Total (random effects)                                      | 1.14 [0.92; 1.42] |
| Heterogeneity: $\chi^2_1 = 0.00$ ( $P = .97$ ), $I^2 = 0\%$ |                   |

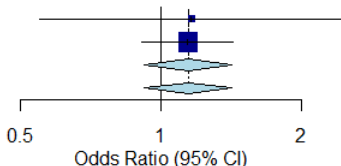

## Hypertension

| Source                                                      | OR (95% CI)       |
|-------------------------------------------------------------|-------------------|
| Wang2020                                                    | 1.10 [0.26; 4.65] |
| Huang2020                                                   | 1.26 [0.68; 2.33] |
| Gupta2020                                                   | 1.06 [0.83; 1.35] |
| Total (fixed effect)                                        | 1.09 [0.87; 1.36] |
| Total (random effects)                                      | 1.09 [0.86; 1.37] |
| Heterogeneity: $\chi^2_2 = 0.26$ ( $P = .88$ ), $I^2 = 0\%$ |                   |

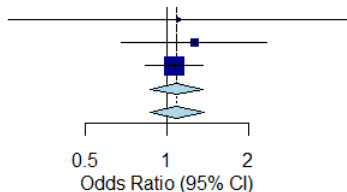

## Active cancer

| Source                                                      | OR (95% CI)       |
|-------------------------------------------------------------|-------------------|
| Dai2020                                                     | 2.17 [0.81; 5.81] |
| Gupta2020                                                   | 2.15 [1.35; 3.42] |
| Total (fixed effect)                                        | 2.15 [1.41; 3.28] |
| Total (random effects)                                      | 2.15 [1.41; 3.28] |
| Heterogeneity: $\chi^2_1 = 0.00$ ( $P = .99$ ), $I^2 = 0\%$ |                   |

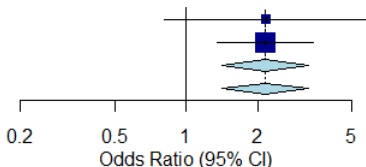

Supplement: Supplementary file [file media-3.pdf]
